# Supplementary material for: Nanoplastic Exposure at Predicted Environmental Concentrations Induces Activation of Germline Ephrin Signal Associated with Toxicity Formation in the Caenorhabditis elegans Offspring
Source: MDPI journal article supplement (doi:10.3390/toxics10110699), 2022-11-17
Supplement: s1 [file s1]

# Supplementary Materials: Nanoplastic Exposure at Predicted Environmental Concentrations Induces Activation of Germline Ephrin Signal Associated with Toxicity Formation in the *Caenorhabditis elegans* Offspring

Yue Zhao, Xin Hua, Qian Bian and Dayong Wang

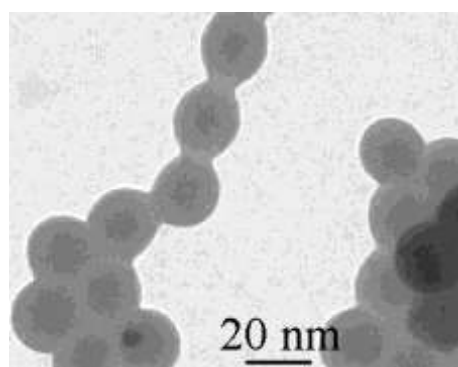

**Figure S1.** TEM image of PS-NPs before the sonication.

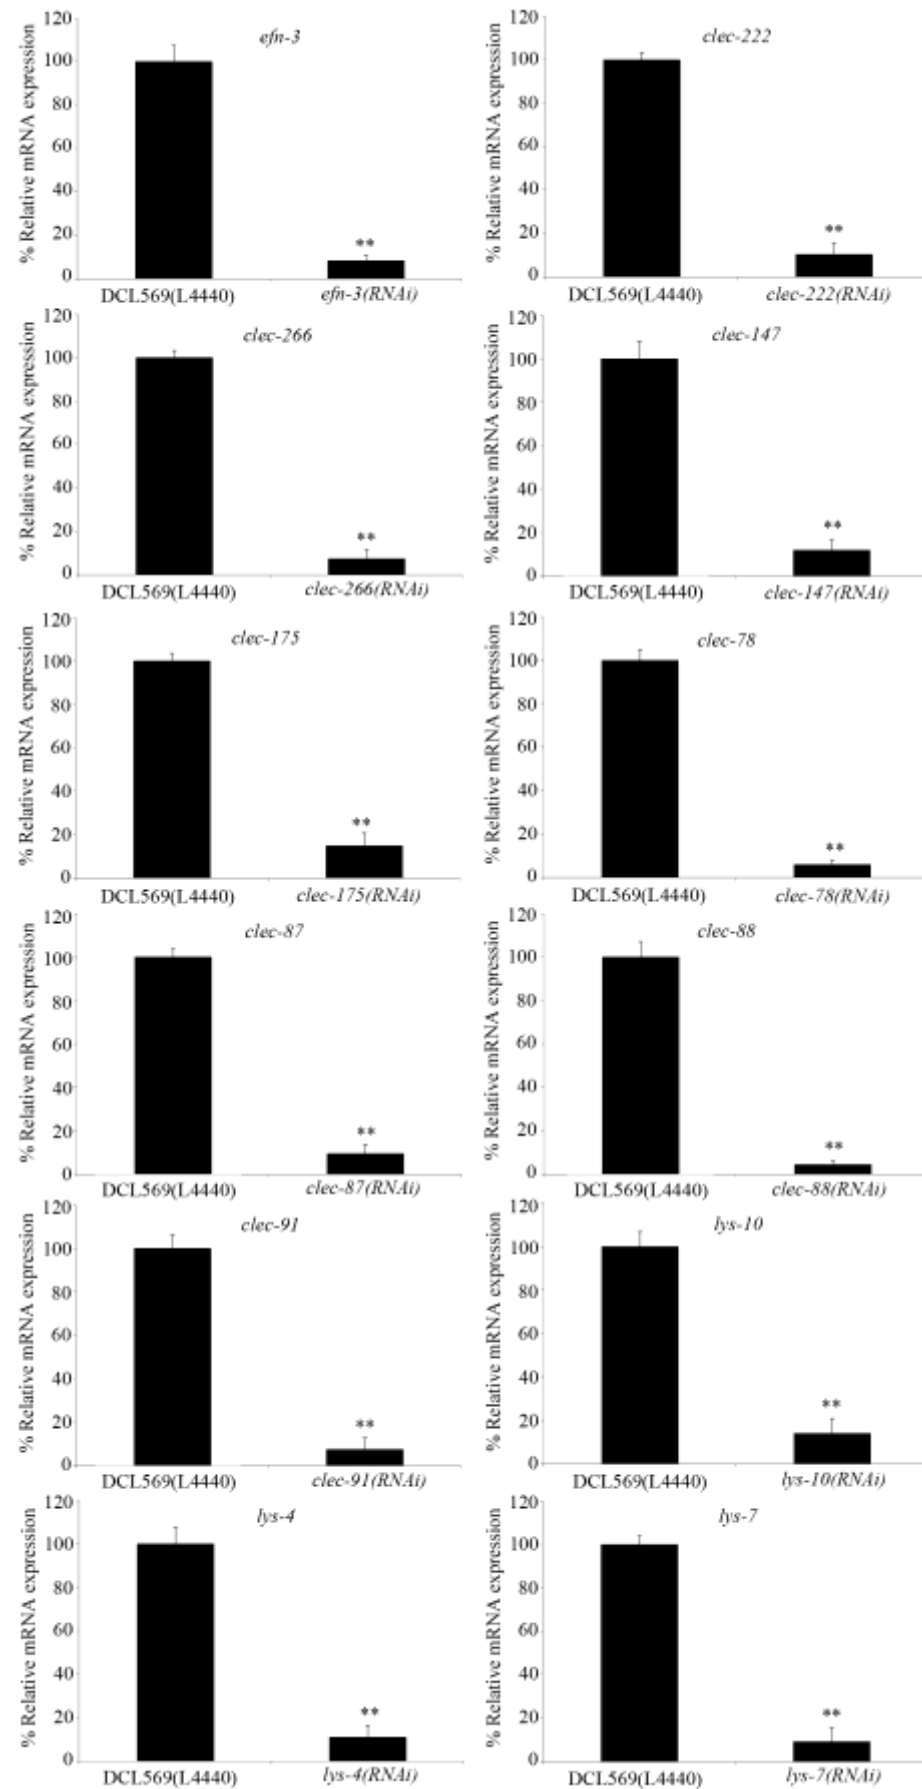

**Figure S2.** Germline RNAi efficiency of *efn-3*, *clec-222*, *clec-266*, *clec-147*, *clec-175*, *clec-78*, *clec-87*, *clec-88*, *clec-91*, *lys-10*, *lys-4*, or *lys-7*. \*\*P < 0.01 vs DCL569(L4440).

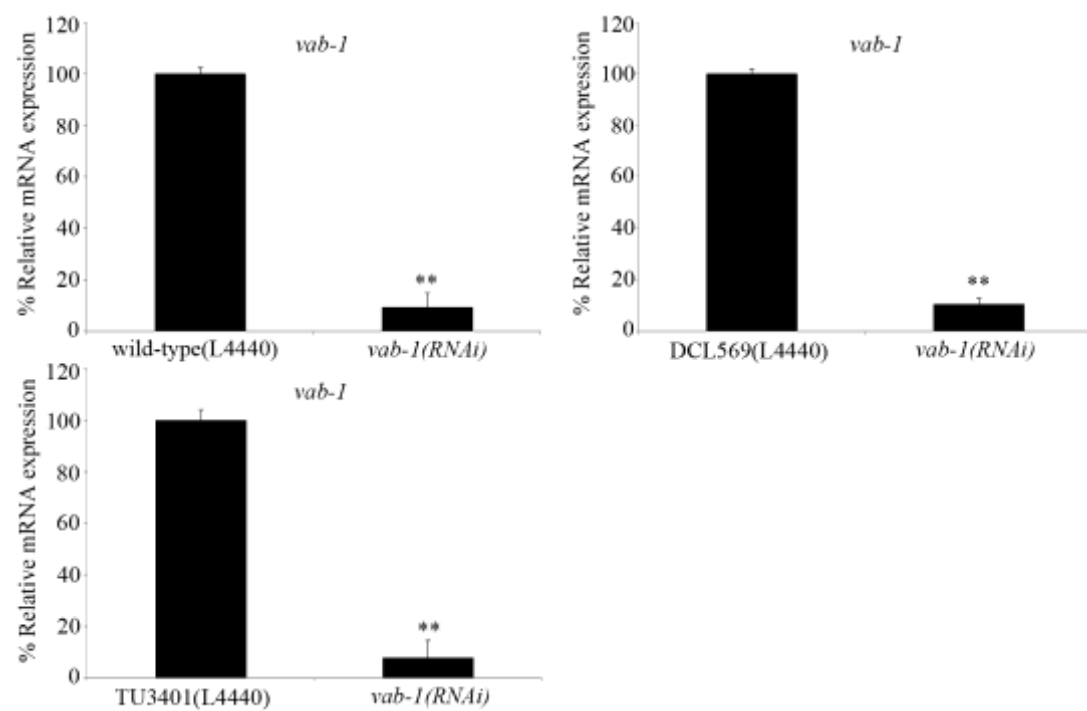

**Figure S3.** RNAi efficiency of *vab-1*. \*\* $P < 0.01$  vs wild-type(L4440), DCL569(L4440), or TU3401(L4440).

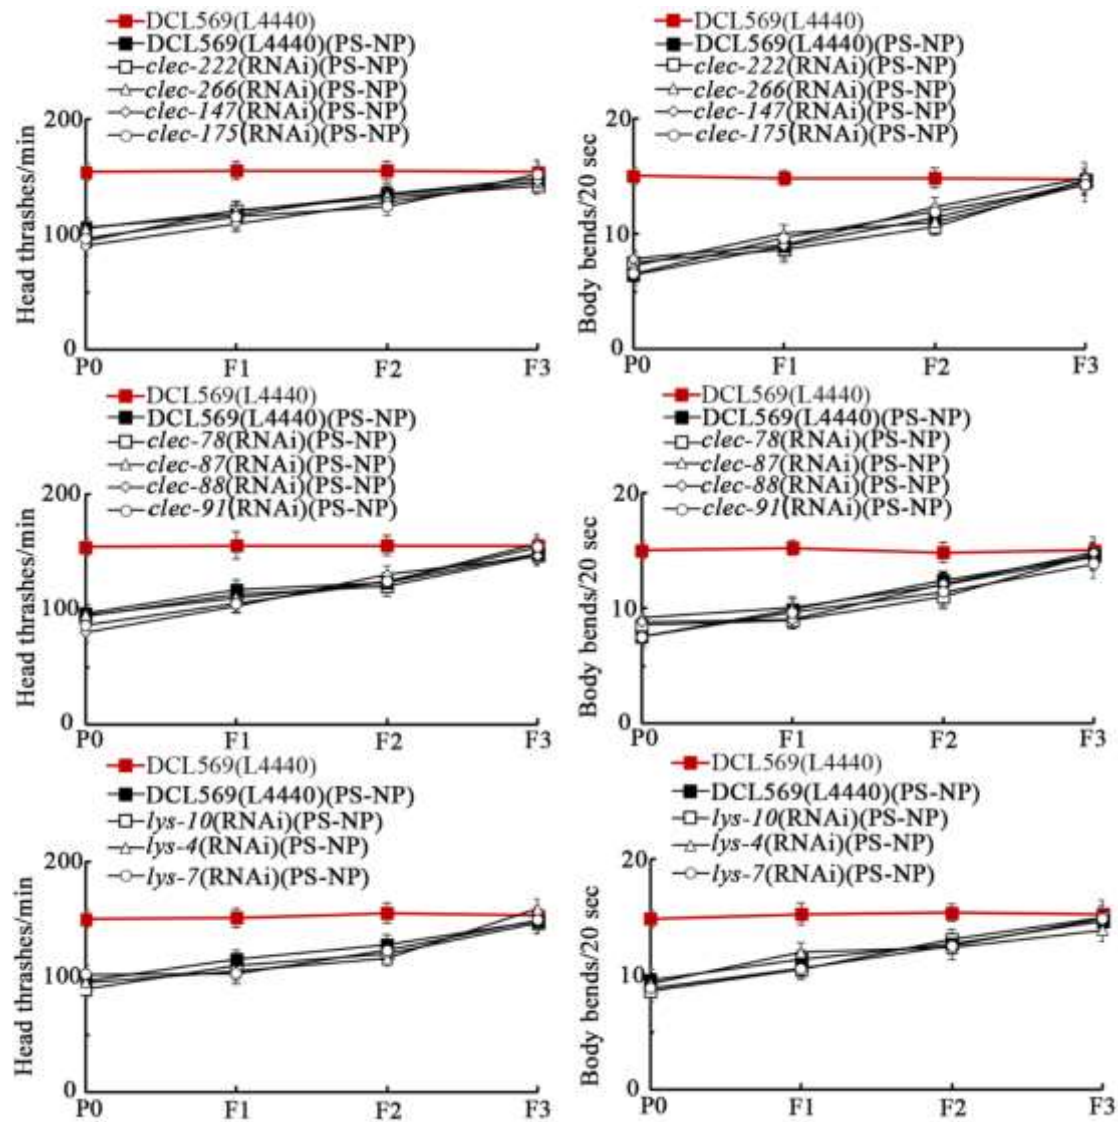

**Figure S4.** Effects of germline RNAi of *clec-222*, *clec-266*, *clec-147*, *clec-175*, *clec-78*, *clec-87*, *clec-88*, *clec-91*, *lys-10*, *lys-4*, or *lys-7* on transgenerational PS-NP toxicity in decreasing locomotion behavior. Exposure concentration of PS-NP was 1  $\mu$ g/L. Curves of DCL569(L4440)(PS-NP) showed a significant difference ( $P < 0.01$ ) compared to DCL569(L4440). After the PS-NP exposure, the curve of *clec-222*(RNAi) ( $P = 0.812$ ), *clec-266*(RNAi) ( $P = 0.879$ ), *clec-147*(RNAi) ( $P = 0.756$ ), *clec-175*(RNAi) ( $P = 0.857$ ), *clec-78*(RNAi) ( $P = 0.925$ ), *clec-87*(RNAi) ( $P = 0.970$ ), *clec-88*(RNAi) ( $P = 0.946$ ), *clec-91*(RNAi) ( $P = 0.879$ ), *lys-10*(RNAi) ( $P = 0.896$ ), *lys-4*(RNAi) ( $P = 0.948$ ), and *lys-7*(RNAi) ( $P = 0.978$ ), did not show significant difference compared to DCL569(L4440).

**Table S1.** Information for *C. elegans* strains.

| Strains | Genotype                                                                  | Description                             |
|---------|---------------------------------------------------------------------------|-----------------------------------------|
| N2      |                                                                           | Wild-type                               |
| DCL569  | <i>mkcSi13[sun-1p::rde-1::sun-1 3'UTR + unc-119(+)]rde-1(mkc36)</i>       | Germline RNAi knockdown tool            |
| TU3401  | <i>sid-1(pk3321);</i><br><i>[pCF]90(myo-2p::mCherry)punc-119p::sid-1]</i> | Neuronal RNAi knockdown tool            |
|         | <i>Is(Pmex-5-efn-3)</i>                                                   | Nematodes overexpressing germline EFN-3 |

**Table S2.** Primer information for qRT-PCR.

| Gene          | Forward primer (5'-3') | Reverse primer (5'-3') |
|---------------|------------------------|------------------------|
| <i>efn-3</i>  | CGGAGTTTGTGCAACCGAAA   | ACCCAACTACCGAGATTGCC   |
| <i>vab-1</i>  | CCCGTGGTGTCAGAAAGTGAA  | GTGGTGGTAGTCGATAGCCG   |
| <i>daf-7</i>  | CCCTTCATCCCCAACAGACC   | GACATTGGCGATTGAGACGC   |
| <i>dbl-1</i>  | TTTTGCGGCGAACAATCGT    | TTCGCTGTTGCCTGTTTGTG   |
| <i>jnk-1</i>  | TATGCTCCACCTCCACTT     | GGGTTCTTGCGTAATCTG     |
| <i>mpk-1</i>  | AACGGGCATCCACAAGCG     | AGTGCAGAGGCGACCATCC    |
| <i>glb-10</i> | TCAACGATCCGCGGAAAGAA   | GAAATCAACATGCCGGGCTC   |
| <i>nhl-2</i>  | GGGGACGCCCTGTTATTCA    | TGATTTGCAGCCAAGGCAAC   |
| <i>ndk-1</i>  | CCAAGGCCCATCTTGAGGTT   | ATCCGTGGCAGATATTGCGT   |
| <i>pat-12</i> | CAAACGGAGAGGTCCGTCAA   | CGGCTCATGTCATCGTCGTA   |
| <i>lin-23</i> | TGCCGGGGACAATGATGAAT   | GTCAAAAGCAGCCATTTCTTGC |
| <i>wrt-3</i>  | GCTTGCGGATTACTGTGGA    | AGCTGGTTTCACATCGGGAAT  |
| <i>egl-1</i>  | GCCTCAACCTCTTCGGATCT   | GCACATTGCTGCTAGCTTGG   |
| <i>tba-1</i>  | TCAACACTGCCATCGCCGCC   | TCCAAGCGAGACCAGGCTTCAG |

**Table S3.** Primer information for constructs generation.

| Gene                 | Forward primer (5'-3')      | Reverse primer (5'-3')      |
|----------------------|-----------------------------|-----------------------------|
| <i>Pmex-5</i>        | ATACTGCAGTTGTAGGCTCTTCTTGCA | TCAGGATCCTCTCTGTCTGAAACATTC |
| <i>efn-3/F15A2.5</i> | ATAGGATCCATGAGCTCAAGCTGGGCC | CAGCTCGAGCTAAAACAAAACACCGCT |

**Table S4.** Dysregulated genes by germline RNAi knockdown of *ksr-1* after PS-NPs exposure.

| Gene name       | log2FC   | Expressed in germline |
|-----------------|----------|-----------------------|
| Y57A10B.6       | 8.769209 | +                     |
| C08F1.10        | 8.422187 |                       |
| Y82E9BR.17      | 4.506934 |                       |
| T05D4.2         | 4.418915 |                       |
| Y73C8C.3        | 3.852964 |                       |
| <i>vet-6</i>    | 3.749902 |                       |
| <i>pes-2.1</i>  | 3.557689 |                       |
| C17E4.2         | 3.548801 | +                     |
| Y106G6D.1       | 3.425848 |                       |
| <i>pap-2</i>    | 3.37     |                       |
| <i>tbx-11</i>   | 3.317655 | +                     |
| Y25C1A.6        | 3.295668 |                       |
| <i>clcc-266</i> | 3.258693 | +                     |
| <i>fbxb-84</i>  | 3.236067 |                       |
| C08F1.6         | 3.187794 |                       |
| T22B2.1         | 3.181919 |                       |
| T12D8.5         | 3.154467 |                       |
| <i>efn-3</i>    | 3.134561 | +                     |
| <i>pes-2.2</i>  | 3.112363 |                       |
| <i>fbxb-103</i> | 3.063931 |                       |
| Y47H10A.2       | 3.033427 | +                     |
| W04A8.5         | 2.962996 | +                     |
| Y43F11A.1       | 2.894374 |                       |
| <i>sdz-30</i>   | 2.857534 |                       |
| Y44A6C.2        | 2.797981 |                       |
| <i>skr-12</i>   | 2.752062 |                       |
| <i>sepa-1</i>   | 2.705083 |                       |
| <i>sdz-37</i>   | 2.672532 | +                     |
| C35E7.5         | 2.654376 | +                     |
| Y43F11A.4       | 2.625558 |                       |
| W08E12.2        | 2.541129 |                       |
| <i>fbxb-15</i>  | 2.452672 |                       |
| <i>stdh-2</i>   | 2.424543 |                       |
| K01G12.3        | 2.415352 | +                     |
| <i>pes-10</i>   | 2.402182 |                       |
| <i>ech-9</i>    | 2.393005 |                       |
| <i>dmsr-16</i>  | 2.390111 |                       |
| Y106G6D.2       | 2.385238 |                       |
| Y65B4BR.1       | 2.351968 |                       |
| <i>skr-8</i>    | 2.337743 |                       |
| <i>sdz-25</i>   | 2.326385 |                       |
| F17E9.2         | 2.285144 |                       |
| M116.1          | 2.276742 |                       |
| <i>btb-11</i>   | 2.25259  |                       |
| <i>fbxc-28</i>  | 2.247712 | +                     |
| <i>fbxc-51</i>  | 2.230555 |                       |
| <i>dsl-2</i>    | 2.217453 | +                     |
| T24C4.2         | 2.214628 | +                     |
| <i>clcc-222</i> | 2.210811 | +                     |
| <i>btb-8</i>    | 2.190256 | +                     |
| <i>btb-10</i>   | 2.177559 |                       |
| Y82E9BR.17      | 2.128212 |                       |
| <i>fkh-4</i>    | 2.118582 | +                     |

|                  |          |   |
|------------------|----------|---|
| <i>skr-7</i>     | 2.089803 | + |
| <i>F10A3.1</i>   | 2.059092 |   |
| <i>K10G6.5</i>   | 2.040173 |   |
| <i>spp-9</i>     | -4.42418 |   |
| <i>Y39G8B.7</i>  | -2.92212 |   |
| <i>dct-19</i>    | -2.92118 |   |
| <i>F25D1.3</i>   | -2.82734 |   |
| <i>C05B5.12</i>  | -2.70422 |   |
| <i>F58B4.7</i>   | -2.52453 |   |
| <i>oac-42</i>    | -2.45072 |   |
| <i>grl-2</i>     | -2.33915 |   |
| <i>F40C5.2</i>   | -2.33238 | + |
| <i>nhr-290</i>   | -2.31174 |   |
| <i>lbp-8</i>     | -2.25486 |   |
| <i>C35E7.5</i>   | -2.20382 |   |
| <i>F41G3.3</i>   | -2.1741  |   |
| <i>F36H2.4</i>   | -2.1353  |   |
| <i>nhr-175</i>   | -2.13115 |   |
| <i>R01E6.5</i>   | -2.11718 |   |
| <i>ugt-34</i>    | -2.10559 |   |
| <i>ZK945.8</i>   | -2.0919  |   |
| <i>ZK402.5</i>   | -2.07473 | + |
| <i>ifa-3</i>     | -2.0724  |   |
| <i>T05B4.12</i>  | -2.05264 |   |
| <i>F31B9.4</i>   | -2.03284 |   |
| <i>C05E11.7</i>  | -2.01693 |   |
| <i>F49D11.14</i> | -2.01086 |   |

Note:.

-Expression information of candidate genes is from <https://wormbase.org>.

-Statistical significance:  $P < 0.01$ .

**Table S5.** Dysregulated genes by germline RNAi knockdown of *ksr-2* after PS-NPs exposure.

| Gene name      | log2FC        | Expressed in germ line |
|----------------|---------------|------------------------|
| C29F5.8        | 14.4158093432 |                        |
| C41G6.13       | 14.2060317226 |                        |
| Y75B12B.8      | 14.1977543808 |                        |
| F47B8.14       | 13.6746335916 |                        |
| F47B8.18       | 13.4128136637 |                        |
| <i>clec-19</i> | 13.3221629302 |                        |
| Y54G2A.57      | 13.2858080250 |                        |
| K04A8.21       | 13.2723575788 |                        |
| F57F4.2        | 13.1769287341 |                        |
| <i>oac-39</i>  | 13.1563293514 |                        |
| <i>scl-1</i>   | 12.4149876014 |                        |
| ZK643.6        | 12.3524449265 |                        |
| F17B5.4        | 12.0182831028 |                        |
| M6.11          | 12.0129012063 |                        |
| <i>oac-41</i>  | 12.0129012063 |                        |
| ZK285.2        | 11.9210726265 | +                      |
| F48G7.7        | 11.7697491878 |                        |
| <i>wrt-7</i>   | 11.6638472222 |                        |
| K08D12.7       | 11.5458293751 |                        |
| C43F9.4        | 11.3926371915 |                        |
| Y59A8B.26      | 11.2851255821 |                        |
| Y59A8B.19      | 11.2024347777 |                        |
| C03G6.6        | 11.1689522466 |                        |
| F20E11.17      | 11.1096813532 |                        |
| K09D9.9        | 11.0531239394 |                        |
| T04C12.1       | 11.0319951941 |                        |
| C33B4.5        | 10.9666863624 |                        |
| Y71F9AM.8      | 10.9328887457 |                        |
| <i>ttr-19</i>  | 10.9041063600 |                        |
| <i>mltn-7</i>  | 10.8865572072 |                        |
| C13A2.6        | 10.8447594452 |                        |
| F40G12.5       | 10.7508943479 |                        |
| <i>ilys-6</i>  | 10.7379045839 |                        |
| C13A2.7        | 10.7049090816 |                        |
| F46H5.11       | 10.6642917918 |                        |
| Y57E12B.11     | 10.6435461157 |                        |
| <i>lip1-8</i>  | 10.6011377708 |                        |
| <i>ilys-3</i>  | 10.4815478651 |                        |
| R08E5.4        | 10.4815478651 |                        |
| <i>sek-5</i>   | 10.3931736897 |                        |
| Y60C6A.2       | 10.3339794532 |                        |
| F39G3.4        | 10.2812336928 |                        |
| T20G5.13       | 10.2541195756 |                        |
| F07G11.3       | 10.2077652757 |                        |
| C07G3.10       | 10.1887983301 | +                      |
| C54F6.17       | 10.1792205217 |                        |
| C41C4.9        | 10.1695787026 |                        |
| C54F6.15       | 10.1203786774 | +                      |
| K01A2.9        | 10.1203786774 |                        |
| <i>cnc-9</i>   | 10.0485519812 |                        |
| Y97E10B.1      | 9.9506156788  |                        |
| K04A8.19       | 9.9164349537  |                        |
| <i>srj-32</i>  | 9.8695632574  |                        |



|           |              |   |
|-----------|--------------|---|
| Y9C9A.5   | 9.8333822774 |   |
| Y71H9A.10 | 9.8333822774 |   |
| spp-20    | 9.8211174635 |   |
| C44H9.7   | 9.8211174635 |   |
| clec-38   | 9.7709881605 |   |
| Y57A10B.2 | 9.6923687753 |   |
| gmd-2     | 9.6923687753 |   |
| B0554.1   | 9.6513918062 |   |
| W02D7.11  | 9.6513918062 |   |
| Y39H10A.1 | 9.6374700324 |   |
| C13A2.9   | 9.6130456156 |   |
| fbxa-142  | 9.6092168562 |   |
| grd-8     | 9.5657717631 |   |
| scl-12    | 9.5502068167 |   |
| C18H7.1   | 9.5358124185 |   |
| ugt-27    | 9.4903230740 |   |
| F15H10.12 | 9.4903230740 |   |
| T05A8.6   | 9.3942460880 |   |
| clec-248  | 9.3264453450 |   |
| fip-1     | 9.2913114010 |   |
| scl-11    | 9.2363192623 |   |
| amt-1     | 9.1995403879 |   |
| pals-29   | 9.1804642818 |   |
| col-51    | 9.1570853953 |   |
| W07G4.7   | 9.1216741910 |   |
| K04A8.18  | 9.1015327855 |   |
| ptr-9     | 9.1015327855 |   |
| smf-2     | 9.1010563993 |   |
| F56H9.8   | 9.0393643677 |   |
| F58E6.4   | 8.9963787319 |   |
| F57A8.7   | 8.9743958841 |   |
| otpl-4    | 8.9293990462 |   |
| F01G10.4  | 8.9293990462 |   |
| Y46E12A.5 | 8.8591576650 |   |
| K07A1.20  | 8.8103551889 |   |
| K01A2.12  | 8.8103551889 |   |
| R13D11.10 | 8.8103551889 |   |
| T05H10.3  | 8.7928646897 | + |
| col-37    | 8.7657156607 |   |
| F07C4.10  | 8.7598438831 |   |
| F15H10.9  | 8.7598438831 |   |
| T28A11.19 | 8.7598438831 |   |
| col-2     | 8.7514506370 |   |
| col-183   | 8.7435447567 |   |
| ceh-76    | 8.7339091846 |   |
| C13A2.10  | 8.7074997216 |   |
| col-185   | 8.6936995865 |   |
| col-108   | 8.6734093412 |   |
| col-85    | 8.6595841383 |   |
| Y68A4A.10 | 8.6531846656 |   |
| chil-15   | 8.6531846656 |   |
| C17G10.10 | 8.6531846656 |   |
| F56F11.1  | 8.6252405523 |   |
| str-143   | 8.6252405523 |   |
| C13A2.12  | 8.6010077679 |   |
| zmp-5     | 8.5967444698 |   |

|                 |              |   |
|-----------------|--------------|---|
| <i>col-52</i>   | 8.5967444698 |   |
| W09C2.9         | 8.5967444698 |   |
| <i>clcc-101</i> | 8.5648831520 |   |
| W08E12.9        | 8.5380060416 |   |
| F35F10.7        | 8.5077149713 |   |
| <i>srj-23</i>   | 8.4767742398 |   |
| <i>scl-13</i>   | 8.4721248429 |   |
| C03H5.4         | 8.4451553682 |   |
| T13C5.10        | 8.4451553682 |   |
| <i>col-158</i>  | 8.4249954220 |   |
| <i>col-40</i>   | 8.4160908992 |   |
| <i>grl-25</i>   | 8.3679435992 |   |
| <i>grl-23</i>   | 8.3623407952 |   |
| <i>cut-1</i>    | 8.3489668420 |   |
| F15H10.5        | 8.3475681220 |   |
| <i>pals-6</i>   | 8.3264537385 |   |
| <i>col-50</i>   | 8.2968940360 |   |
| <i>col-102</i>  | 8.2354274728 |   |
| <i>col-36</i>   | 8.1770731522 |   |
| <i>col-72</i>   | 8.1758948170 |   |
| F47B8.13        | 8.0862438300 |   |
| <i>grl-9</i>    | 8.0049480838 |   |
| F07G11.1        | 7.9920689899 |   |
| <i>grl-20</i>   | 7.9793010676 |   |
| <i>col-43</i>   | 7.9427192380 |   |
| <i>col-84</i>   | 7.9362265688 |   |
| <i>col-44</i>   | 7.8208344554 |   |
| <i>cri-1</i>    | 7.8041693525 |   |
| <i>asp-9</i>    | 7.7249224148 |   |
| <i>col-45</i>   | 7.7155579688 |   |
| <i>daf-42</i>   | 7.6092721083 |   |
| <i>roc-1</i>    | 7.5042968541 |   |
| <i>spp-11</i>   | 7.4466157304 |   |
| <i>col-35</i>   | 7.4378905490 |   |
| K01D12.10       | 7.4235434897 |   |
| C33G8.13        | 7.4109644501 |   |
| Y57E12B.4       | 7.3693907473 |   |
| C10F3.7         | 7.2915223058 |   |
| <i>clcc-59</i>  | 7.2822627174 |   |
| C08A9.3         | 7.2092000018 | + |
| <i>col-114</i>  | 7.0790054940 |   |
| ZK355.8         | 7.0584232676 |   |
| <i>grd-7</i>    | 7.0562802925 | + |
| <i>fbxa-165</i> | 6.9925941112 |   |
| <i>col-164</i>  | 6.9741703436 |   |
| C13A2.5         | 6.9590233001 |   |
| ZK355.3         | 6.8818952618 |   |
| <i>col-123</i>  | 6.8277538199 |   |
| <i>col-163</i>  | 6.8165929482 |   |
| <i>hsp-12.6</i> | 6.7998048515 |   |
| <i>grl-19</i>   | 6.7868862221 |   |
| F23F1.2         | 6.7074946380 |   |
| <i>grl-24</i>   | 6.6893526528 |   |
| R05A10.1        | 6.6514327805 |   |
| F32G8.2         | 6.6359057667 |   |
| F53F4.4         | 6.5905106649 |   |

|                  |              |   |
|------------------|--------------|---|
| Y6E2A.4          | 6.5882426273 |   |
| Y71F9AR.10       | 6.5541241402 |   |
| Y60C6A.3         | 6.4782968562 |   |
| H39E23.3         | 6.4619670867 |   |
| <i>tyr-3</i>     | 6.3933339477 |   |
| <i>grl-17</i>    | 6.3781746585 |   |
| <i>catp-2</i>    | 6.3421178700 |   |
| <i>droe-8</i>    | 6.2915945048 |   |
| C13A2.4          | 6.2631016547 |   |
| C13A2.3          | 6.1370885731 |   |
| C46A5.4          | 6.0676370680 |   |
| <i>acs-2</i>     | 6.0415850302 |   |
| K08D9.2          | 6.0401174322 |   |
| <i>cyp-33B1</i>  | 6.0335143122 |   |
| W01C9.2          | 5.9936130396 |   |
| H14N18.2         | 5.9832626873 |   |
| <i>grd-9</i>     | 5.9637987310 |   |
| K09E2.1          | 5.9626432555 |   |
| K08D9.6          | 5.9248473295 |   |
| <i>cpr-2</i>     | 5.8599826806 |   |
| <i>nas-10</i>    | 5.8307828215 |   |
| <i>pals-32</i>   | 5.7509061380 |   |
| <i>grd-4</i>     | 5.7216210449 |   |
| <i>dmd-10</i>    | 5.7195741932 |   |
| <i>nhr-246</i>   | 5.6817016154 |   |
| Y57E12B.1        | 5.6736163529 |   |
| <i>nas-28</i>    | 5.6729154236 |   |
| W07B8.4          | 5.6427805764 |   |
| F36G9.7          | 5.5959710902 |   |
| Y46H3A.5         | 5.5686571552 |   |
| F53F4.7          | 5.5632533922 |   |
| <i>pals-14</i>   | 5.4799171274 |   |
| F20D6.2          | 5.4230168305 |   |
| <i>cllec-228</i> | 5.3955474278 |   |
| F59F5.4          | 5.3508101520 |   |
| <i>cest-35.2</i> | 5.3465219765 |   |
| T20G5.12         | 5.3371693309 |   |
| <i>cllec-20</i>  | 5.3225273669 |   |
| Y38C1AB.7        | 5.3211420212 |   |
| C28D4.10         | 5.3125654231 | + |
| <i>arrd-11</i>   | 5.2889661050 |   |
| <i>dmd-10</i>    | 5.2745215481 |   |
| W09C2.8          | 5.2219497769 |   |
| F59A6.10         | 5.1905195233 |   |
| C17G10.6         | 5.1494415475 |   |
| F32D8.8          | 5.1383349722 | + |
| <i>zip-8</i>     | 5.1122397223 |   |
| T26C12.2         | 5.0983067488 |   |
| <i>lys-3</i>     | 5.0976135337 |   |
| C40H1.9          | 5.0657427325 |   |
| <i>lys-10</i>    | 5.0499377824 | + |
| <i>mtl-1</i>     | 5.0172234098 |   |
| F20C5.7          | 5.0112879685 |   |
| <i>pals-37</i>   | 4.9883932857 |   |
| M02E1.4          | 4.9845582009 |   |
| W04G5.10         | 4.9232702547 |   |

|                 |              |   |
|-----------------|--------------|---|
| <i>pals-26</i>  | 4.8730112625 |   |
| <i>dos-3</i>    | 4.8728987271 |   |
| <i>fbxa-164</i> | 4.8359773779 |   |
| Y9C9A.16        | 4.8267664688 |   |
| F15H10.10       | 4.8149568962 |   |
| <i>col-151</i>  | 4.7704875442 |   |
| <i>his-34</i>   | 4.7692471694 | + |
| <i>pqn-97</i>   | 4.7588638195 |   |
| <i>pals-39</i>  | 4.7582260140 |   |
| <i>arrd-28</i>  | 4.7458374862 |   |
| <i>his-29</i>   | 4.7220416750 | + |
| Y65B4BR.1       | 4.7137366522 |   |
| F26F2.1         | 4.7113889545 |   |
| C12D5.5         | 4.6997609112 |   |
| C29A12.6        | 4.6853620818 |   |
| C17C3.3         | 4.6796286640 |   |
| <i>pals-33</i>  | 4.6739556378 |   |
| Y34F4.2         | 4.6710642527 |   |
| <i>col-86</i>   | 4.6366883918 |   |
| <i>col-116</i>  | 4.6329221028 |   |
| Y47H9A.1        | 4.6227278930 |   |
| <i>cut-5</i>    | 4.6192877895 |   |
| <i>grl-3</i>    | 4.6192204635 | + |
| <i>clec-61</i>  | 4.6161883157 |   |
| F45D11.16       | 4.6054984529 |   |
| F23B2.10        | 4.5536430772 |   |
| <i>oac-55</i>   | 4.5419444790 |   |
| <i>pals-27</i>  | 4.5041428815 |   |
| <i>col-33</i>   | 4.5032127744 |   |
| <i>tba-8</i>    | 4.4967102288 | + |
| F07G11.4        | 4.4904482255 |   |
| Y116F11B.9      | 4.4881245622 |   |
| R07C12.1        | 4.4871107972 |   |
| F16B4.7         | 4.4848737567 |   |
| <i>cut-6</i>    | 4.4555476377 | + |
| W01A11.7        | 4.4520524555 |   |
| F49H6.5         | 4.4332558117 |   |
| <i>sod-3</i>    | 4.4232749900 | + |
| F53H2.1         | 4.4224758506 |   |
| ZC196.2         | 4.4143484475 |   |
| T22F3.11        | 4.4061918144 |   |
| W07A12.4        | 4.4016952748 |   |
| <i>lips-8</i>   | 4.3997577649 |   |
| C06E7.88        | 4.3719511629 |   |
| M60.7           | 4.3718175611 | + |
| <i>clec-11</i>  | 4.3705989812 |   |
| F48F7.3         | 4.3521309721 |   |
| <i>col-171</i>  | 4.3396582497 |   |
| C36B7.4         | 4.3349689403 |   |
| <i>mltn-6</i>   | 4.3235464638 |   |
| <i>srh-146</i>  | 4.2954778334 |   |
| <i>fbxa-21</i>  | 4.2751897153 |   |
| F45D11.14       | 4.2726520541 |   |
| F45D11.15       | 4.2390029616 |   |
| T08E11.1        | 4.2158877601 |   |
| Y43F8B.23       | 4.1638696850 |   |

|                   |              |   |
|-------------------|--------------|---|
| <i>F10C2.7</i>    | 4.1436286926 |   |
| <i>col-87</i>     | 4.1346914817 |   |
| <i>cyp-35B1</i>   | 4.1300320937 |   |
| <i>his-28</i>     | 4.1049486208 | + |
| <i>C13A2.1</i>    | 4.0977473792 | + |
| <i>rgba-1</i>     | 4.0908354092 |   |
| <i>pals-30</i>    | 4.0908354092 |   |
| <i>his-17</i>     | 4.0511881737 | + |
| <i>math-42</i>    | 4.0421045719 |   |
| <i>W03G1.5</i>    | 4.0367017594 |   |
| <i>Y110A2AL.4</i> | 4.0299145976 |   |
| <i>M05D6.8</i>    | 4.0295926585 | + |
| <i>T12D8.5</i>    | 4.0267636132 |   |
| <i>his-50</i>     | 4.0055018228 | + |
| <i>his-1</i>      | 4.0017201240 | + |
| <i>C48B4.13</i>   | 3.9823302693 | + |
| <i>C50F7.5</i>    | 3.9759365454 |   |
| <i>pals-38</i>    | 3.9736115567 |   |
| <i>cllec-234</i>  | 3.9648606914 |   |
| <i>ZK218.3</i>    | 3.9637208552 |   |
| <i>F38B7.11</i>   | 3.9586994888 |   |
| <i>F42C5.3</i>    | 3.9470259117 | + |
| <i>cllec-55</i>   | 3.9441204263 |   |
| <i>C05G5.7</i>    | 3.9271932956 |   |
| <i>lact-6</i>     | 3.9212947298 |   |
| <i>W03F9.4</i>    | 3.9092448149 | + |
| <i>T14A8.2</i>    | 3.9001503126 | + |
| <i>ref-2</i>      | 3.8986891608 |   |
| <i>his-27</i>     | 3.8916853069 | + |
| <i>fbxa-138</i>   | 3.8893222602 |   |
| <i>arrd-16</i>    | 3.8788703307 |   |
| <i>C31H5.1</i>    | 3.8734965673 |   |
| <i>his-32</i>     | 3.8570123101 | + |
| <i>F11A5.17</i>   | 3.8475316490 |   |
| <i>M03A1.3</i>    | 3.8280054019 |   |
| <i>Y73B6BL.37</i> | 3.8273802533 |   |
| <i>F10B5.3</i>    | 3.8258596143 |   |
| <i>F13E9.8</i>    | 3.8132297945 |   |
| <i>his-49</i>     | 3.8112115493 | + |
| <i>F14F3.4</i>    | 3.8010254424 |   |
| <i>Y47D3B.3</i>   | 3.7815035676 |   |
| <i>ZC443.3</i>    | 3.7753188764 | + |
| <i>cllec-9</i>    | 3.7150948301 |   |
| <i>srh-2</i>      | 3.6925430627 | + |
| <i>hpx-2</i>      | 3.6639114091 |   |
| <i>pqn-16</i>     | 3.6600915462 |   |
| <i>otpl-6</i>     | 3.6600915462 |   |
| <i>lipl-4</i>     | 3.6288269273 |   |
| <i>Y43F8B.15</i>  | 3.6210494792 |   |
| <i>ftn-1</i>      | 3.6203083874 |   |
| <i>C25F9.2</i>    | 3.6070644759 |   |
| <i>W04G5.9</i>    | 3.6056407779 |   |
| <i>lmd-4</i>      | 3.6016484947 |   |
| <i>ZC443.2</i>    | 3.5984520965 | + |
| <i>F44A2.7</i>    | 3.5928874034 |   |
| <i>T14B1.1</i>    | 3.5918964742 |   |

|                  |              |   |
|------------------|--------------|---|
| <i>icl-1</i>     | 3.5862175592 | + |
| <i>znf-782</i>   | 3.5796938488 | + |
| <i>asp-16</i>    | 3.5744420451 |   |
| <i>F01D4.8</i>   | 3.5672428550 |   |
| <i>K06C4.1</i>   | 3.5520137486 |   |
| <i>dlhd-1</i>    | 3.5473850370 |   |
| <i>C17D12.3</i>  | 3.5297149989 |   |
| <i>aqp-6</i>     | 3.5259141264 |   |
| <i>cest-7</i>    | 3.5232169868 |   |
| <i>ifas-2</i>    | 3.5206996687 |   |
| <i>T20D4.12</i>  | 3.4947787583 |   |
| <i>C35A5.11</i>  | 3.4938534200 | + |
| <i>F12A10.9</i>  | 3.4721486190 |   |
| <i>cyp-13A3</i>  | 3.4715656217 | + |
| <i>gst-3</i>     | 3.4710925082 |   |
| <i>tsp-17</i>    | 3.4615580698 | + |
| <i>ins-11</i>    | 3.4568076262 | + |
| <i>cutl-23</i>   | 3.4525052190 | + |
| <i>Y47H10A.3</i> | 3.4459699340 |   |
| <i>cng-3</i>     | 3.4424804882 |   |
| <i>cllec-34</i>  | 3.4351789867 |   |
| <i>T10C6.15</i>  | 3.4340218826 |   |
| <i>F20B6.4</i>   | 3.4243030263 |   |
| <i>srw-85</i>    | 3.4168025452 |   |
| <i>pals-2</i>    | 3.4147524019 |   |
| <i>W03D2.9</i>   | 3.4137286767 |   |
| <i>T06E4.7</i>   | 3.4013654660 | + |
| <i>W09G12.8</i>  | 3.3917732950 |   |
| <i>his-11</i>    | 3.3814475429 | + |
| <i>srx-128</i>   | 3.3812486864 |   |
| <i>cllec-17</i>  | 3.3799787587 |   |
| <i>Y18H1A.14</i> | 3.3706181416 |   |
| <i>T05E11.8</i>  | 3.3553642176 |   |
| <i>his-15</i>    | 3.3534005218 | + |
| <i>irl-34</i>    | 3.3516778417 | + |
| <i>cyp-13A8</i>  | 3.3508541602 |   |
| <i>oac-40</i>    | 3.3496298148 |   |
| <i>ugt-4</i>     | 3.3461231270 |   |
| <i>R04B5.6</i>   | 3.3414207191 |   |
| <i>dod-3</i>     | 3.3405718641 |   |
| <i>W08E12.2</i>  | 3.3258915888 |   |
| <i>F14H8.2</i>   | 3.3249194617 |   |
| <i>fbxa-66</i>   | 3.3190237151 |   |
| <i>dach-1</i>    | 3.3093575839 |   |
| <i>fbxa-182</i>  | 3.3041505099 |   |
| <i>cpr-1</i>     | 3.2979664717 |   |
| <i>F26G1.3</i>   | 3.2976207002 |   |
| <i>C17F4.12</i>  | 3.2864720735 |   |
| <i>cllec-15</i>  | 3.2858853645 |   |
| <i>sre-6</i>     | 3.2841968884 |   |
| <i>fbxa-136</i>  | 3.2790594357 |   |
| <i>cllec-13</i>  | 3.2764535554 |   |
| <i>K03D3.2</i>   | 3.2732690877 | + |
| <i>gcy-8</i>     | 3.2730235799 |   |
| <i>T26H5.8</i>   | 3.2724865475 |   |
| <i>nhr-221</i>   | 3.2716080645 |   |

|                 |              |   |
|-----------------|--------------|---|
| <i>his-44</i>   | 3.2663783946 | + |
| Y39G8B.5        | 3.2521734441 |   |
| <i>txt-3</i>    | 3.2443211168 |   |
| <i>F10A3.1</i>  | 3.2431358480 |   |
| <i>nhr-30</i>   | 3.2369918948 |   |
| <i>F09F7.6</i>  | 3.2227360987 |   |
| <i>ZK185.4</i>  | 3.2214738563 |   |
| <i>cyp-23A1</i> | 3.2209983602 |   |
| <i>F09C6.3</i>  | 3.2168504894 |   |
| <i>F32G8.3</i>  | 3.2080845757 |   |
| <i>clcc-78</i>  | 3.2047677818 | + |
| <i>pqn-98</i>   | 3.1991463738 |   |
| Y39A1A.9        | 3.1975733785 |   |
| <i>rab-11.2</i> | 3.1964239045 |   |
| <i>tsp-6</i>    | 3.1925701866 |   |
| <i>his-22</i>   | 3.1856971121 | + |
| <i>F32D8.12</i> | 3.1711368734 |   |
| <i>hil-1</i>    | 3.1700743842 |   |
| <i>mls-2</i>    | 3.1688939057 |   |
| <i>C08E3.13</i> | 3.1662561693 |   |
| <i>F40F9.10</i> | 3.1624040220 |   |
| <i>R07C12.3</i> | 3.1549342933 |   |
| <i>nspg-5</i>   | 3.1499819187 |   |
| <i>T23F6.5</i>  | 3.1480907571 | + |
| <i>irl-2</i>    | 3.1440956465 |   |
| <i>atf-8</i>    | 3.1432164351 |   |
| <i>his-45</i>   | 3.1390635327 | + |
| <i>gpa-13</i>   | 3.1290163187 |   |
| <i>T07G12.4</i> | 3.1252684870 |   |
| <i>nhr-159</i>  | 3.1189667872 |   |
| <i>cyp-35B2</i> | 3.1189084631 |   |
| <i>ugt-53</i>   | 3.1170411926 |   |
| <i>his-6</i>    | 3.1082607580 | + |
| <i>cyp-13A1</i> | 3.1060991661 |   |
| <i>spp-2</i>    | 3.1058557118 |   |
| <i>sodh-1</i>   | 3.0993971096 | + |
| <i>his-55</i>   | 3.0978911893 | + |
| <i>cpr-4</i>    | 3.0918506931 |   |
| <i>hen-1</i>    | 3.0916851505 | + |
| <i>clcc-60</i>  | 3.0877655546 |   |
| <i>ZK856.14</i> | 3.0868606562 |   |
| <i>nhr-21</i>   | 3.0761231117 | + |
| <i>R06A10.1</i> | 3.0745285413 |   |
| <i>ugt-59</i>   | 3.0708864806 |   |
| <i>cut-3</i>    | 3.0673905901 | + |
| <i>F09E10.6</i> | 3.0671693813 |   |
| <i>B0310.3</i>  | 3.0624623721 |   |
| <i>npax-3</i>   | 3.0614531667 |   |
| <i>eol-1</i>    | 3.0605078516 |   |
| <i>fk-7</i>     | 3.0599709652 | + |
| <i>zig-3</i>    | 3.0542214268 | + |
| <i>T07H8.11</i> | 3.0533268615 |   |
| <i>sel-7</i>    | 3.0506028297 | + |
| <i>dyf-19</i>   | 3.0494954598 | + |
| <i>his-59</i>   | 3.0491592797 | + |
| <i>W04G5.8</i>  | 3.0411459228 |   |

|                  |              |   |
|------------------|--------------|---|
| <i>F32D8.2</i>   | 3.0390618039 |   |
| <i>F07C4.6</i>   | 3.0384435763 |   |
| <i>nhr-137</i>   | 3.0370369330 |   |
| <i>kreg-1</i>    | 3.0361656453 |   |
| <i>DH11.2</i>    | 3.0281324932 |   |
| <i>T19C9.8</i>   | 3.0232888255 |   |
| <i>F33H12.7</i>  | 3.0196056308 |   |
| <i>R07A4.3</i>   | 3.0147033126 |   |
| <i>C09G5.13</i>  | 3.0142439885 |   |
| <i>mltn-1</i>    | 3.0086008027 | + |
| <i>his-2</i>     | 3.0082117663 | + |
| <i>F14D7.10</i>  | 3.0082117663 |   |
| <i>F43C11.8</i>  | 3.0068342998 |   |
| <i>F48C1.11</i>  | 3.0023346554 |   |
| <i>his-14</i>    | 2.9980402507 | + |
| <i>his-4</i>     | 2.9975336729 | + |
| <i>his-62</i>    | 2.9881354277 | + |
| <i>his-10</i>    | 2.9862991687 | + |
| <i>K03B4.8</i>   | 2.9861143438 |   |
| <i>Y39B6A.1</i>  | 2.9753941132 |   |
| <i>Y41D4A.1</i>  | 2.9625021305 |   |
| <i>E02H4.4</i>   | 2.9585866801 |   |
| <i>F37A4.6</i>   | 2.9577244467 | + |
| <i>K02C4.2</i>   | 2.9543791244 | + |
| <i>his-18</i>    | 2.9469998784 | + |
| <i>R05A10.7</i>  | 2.9452990077 |   |
| <i>nhr-147</i>   | 2.9345339125 | + |
| <i>C09B8.4</i>   | 2.9345339125 |   |
| <i>F32D8.11</i>  | 2.9326997393 |   |
| <i>ZC395.5</i>   | 2.9272408774 |   |
| <i>ZC204.12</i>  | 2.9204510997 | + |
| <i>oac-56</i>    | 2.9197543381 |   |
| <i>E04D5.4</i>   | 2.9146960358 |   |
| <i>math-34</i>   | 2.9112633441 |   |
| <i>F37A8.5</i>   | 2.9108921344 | + |
| <i>ZK105.13</i>  | 2.9096341922 |   |
| <i>EEED8.2</i>   | 2.8977457047 |   |
| <i>Y51B9A.9</i>  | 2.8941783347 |   |
| <i>mpst-2</i>    | 2.8881260707 |   |
| <i>skpo-2</i>    | 2.8817333804 | + |
| <i>T20D4.11</i>  | 2.8806944444 |   |
| <i>his-63</i>    | 2.8683524968 | + |
| <i>sqst-3</i>    | 2.8633890053 |   |
| <i>cky-1</i>     | 2.8628647778 |   |
| <i>F21C10.10</i> | 2.8617919333 |   |
| <i>C04A11.5</i>  | 2.8613249550 | + |
| <i>ZC239.14</i>  | 2.8598637019 |   |
| <i>skr-5</i>     | 2.8509125356 | + |
| <i>bnc-1</i>     | 2.8492268884 |   |
| <i>his-12</i>    | 2.8485498440 | + |
| <i>T22B7.3</i>   | 2.8469392437 | + |
| <i>peb-1</i>     | 2.8419828793 | + |
| <i>ZK1240.1</i>  | 2.8392902595 |   |
| <i>F07B7.8</i>   | 2.8392902595 |   |
| <i>cyp-37B1</i>  | 2.8170845559 |   |
| <i>clec-42</i>   | 2.8138395623 |   |



|                 |              |   |
|-----------------|--------------|---|
| <i>cutl-9</i>   | 2.8113969501 | + |
| <i>his-9</i>    | 2.8093566389 | + |
| <i>ceh-16</i>   | 2.8086815753 | + |
| ZK836.3         | 2.8057401494 |   |
| C23H5.15        | 2.7948919135 |   |
| <i>his-52</i>   | 2.7927052626 | + |
| <i>his-25</i>   | 2.7922138151 | + |
| <i>his-13</i>   | 2.7912199217 | + |
| Y22D7AL.16      | 2.7848857641 |   |
| M01B2.13        | 2.7794366875 |   |
| <i>ddo-2</i>    | 2.7781551510 |   |
| T12E12.6        | 2.7757245755 |   |
| <i>oac-37</i>   | 2.7741188705 |   |
| C12D5.3         | 2.7692211246 |   |
| <i>his-5</i>    | 2.7645756803 | + |
| T01B10.5        | 2.7576677552 |   |
| F47B10.8        | 2.7555905215 | + |
| F17B5.1         | 2.7370963108 |   |
| T10G3.8         | 2.7367954728 |   |
| F47B8.4         | 2.7304856149 |   |
| <i>anoh-1</i>   | 2.7238700391 |   |
| F32D1.11        | 2.7211200839 |   |
| <i>prdm-14</i>  | 2.7120621736 | + |
| C39D10.5        | 2.7120621736 |   |
| <i>fbxa-52</i>  | 2.7120621736 |   |
| ZK993.2         | 2.7120621736 |   |
| Y116A8C.43      | 2.7086642770 |   |
| <i>fipr-24</i>  | 2.6964778529 |   |
| <i>bro-1</i>    | 2.6940445742 |   |
| <i>srd-53</i>   | 2.6905152349 |   |
| <i>his-16</i>   | 2.6882412501 | + |
| <i>fbxa-24</i>  | 2.6845561696 |   |
| T05C1.3         | 2.6824903426 | + |
| <i>his-54</i>   | 2.6763299861 | + |
| C38D9.2         | 2.6583927339 | + |
| <i>his-43</i>   | 2.6545992817 | + |
| C18H9.1         | 2.6533237454 |   |
| B0507.6         | 2.6475117128 |   |
| <i>scl-2</i>    | 2.6399235041 |   |
| <i>his-60</i>   | 2.6378475408 | + |
| <i>clec-12</i>  | 2.6349373946 |   |
| <i>his-46</i>   | 2.6200542354 | + |
| <i>his-56</i>   | 2.6196170880 | + |
| Y69H2.10        | 2.6168045307 |   |
| F47B10.3        | 2.6145108119 |   |
| <i>fbxa-166</i> | 2.6136859578 |   |
| F44A6.5         | 2.6125573149 | + |
| B0205.4         | 2.6107546346 |   |
| <i>btb-16</i>   | 2.6084386878 |   |
| T05A8.8         | 2.6063258865 |   |
| C26B9.7         | 2.6004273087 | + |
| C14A11.2        | 2.5991460617 |   |
| <i>nnt-1</i>    | 2.5942214772 | + |
| <i>nhr-260</i>  | 2.5938218784 |   |
| <i>his-20</i>   | 2.5932743963 | + |
| <i>far-7</i>    | 2.5859547767 |   |

|                 |              |   |
|-----------------|--------------|---|
| F23H12.5        | 2.5856562868 |   |
| C03B1.5         | 2.5772435493 |   |
| <i>ins-35</i>   | 2.5717526244 | + |
| <i>acr-14</i>   | 2.5706628366 |   |
| <i>rol-8</i>    | 2.5706006353 |   |
| T07G12.5        | 2.5688058958 |   |
| F26D11.2        | 2.5681964546 |   |
| <i>dhc-3</i>    | 2.5677643754 |   |
| <i>ast-1</i>    | 2.5659551712 |   |
| <i>trp-4</i>    | 2.5628759415 |   |
| <i>hacd-1</i>   | 2.5614801588 |   |
| T19C3.3         | 2.5581183238 |   |
| F42G2.5         | 2.5546369309 |   |
| F49C12.10       | 2.5545664591 |   |
| <i>cla-1</i>    | 2.5542519287 |   |
| <i>sre-4</i>    | 2.5532538881 |   |
| Y46G5A.38       | 2.5514127285 |   |
| C43H6.6         | 2.5509686513 |   |
| <i>his-66</i>   | 2.5490982904 | + |
| <i>dpy-1</i>    | 2.5477415192 | + |
| <i>slc-36.5</i> | 2.5458460904 | + |
| <i>gcy-36</i>   | 2.5456903616 |   |
| W09C2.7         | 2.5433979925 |   |
| <i>lmd-5</i>    | 2.5388527471 |   |
| C35A11.2        | 2.5385364285 |   |
| Y34F4.6         | 2.5345958294 |   |
| <i>comt-1</i>   | 2.5312261326 |   |
| <i>cyp-14A1</i> | 2.5286136949 |   |
| <i>his-58</i>   | 2.5250556015 | + |
| H40L08.3        | 2.5240900265 | + |
| <i>cbn-1</i>    | 2.5197329870 | + |
| <i>ugt-57</i>   | 2.5189085323 |   |
| <i>mfb-1</i>    | 2.5184795433 |   |
| <i>pag-3</i>    | 2.5144517270 |   |
| <i>oac-14</i>   | 2.5125216729 |   |
| <i>clcc-145</i> | 2.5118303786 |   |
| C44F1.1         | 2.5111785879 |   |
| <i>fbxa-163</i> | 2.5042706137 |   |
| F15B9.6         | 2.4968892948 |   |
| K03A11.4        | 2.4957693253 |   |
| <i>his-65</i>   | 2.4933350807 | + |
| <i>math-37</i>  | 2.4911231125 |   |
| T06G6.6         | 2.4875889837 | + |
| K02A2.5         | 2.4860381977 | + |
| F57B9.3         | 2.4847706948 |   |
| <i>gpdh-1</i>   | 2.4841217674 | + |
| ZK1225.1        | 2.4685264193 |   |
| <i>his-26</i>   | 2.4682001420 | + |
| B0507.8         | 2.4653501072 |   |
| <i>his-48</i>   | 2.4642762973 | + |
| <i>kqb-2</i>    | 2.4618880717 |   |
| C28C12.4        | 2.4600504012 |   |
| <i>nhr-208</i>  | 2.4590696963 | + |
| C15F1.2         | 2.4576839541 |   |
| Y110A2AL.3      | 2.4555148541 |   |
| <i>his-47</i>   | 2.4509077293 | + |

|                 |              |   |
|-----------------|--------------|---|
| <i>F47F2.3</i>  | 2.4479533162 |   |
| <i>pals-31</i>  | 2.4465860870 | + |
| <i>his-57</i>   | 2.4442672866 | + |
| Y71H2AM.25      | 2.4430513416 |   |
| <i>F26G1.9</i>  | 2.4395047112 | + |
| <i>lim-4</i>    | 2.4365639390 |   |
| <i>col-46</i>   | 2.4187480409 |   |
| <i>Y6G8.2</i>   | 2.4147108052 |   |
| <i>F39F10.4</i> | 2.4064563309 | + |
| <i>F53A9.7</i>  | 2.4039768414 |   |
| <i>F32D8.3</i>  | 2.4035891819 | + |
| <i>Y6E2A.5</i>  | 2.4031428624 |   |
| <i>F15E6.3</i>  | 2.4022018168 |   |
| <i>dct-1</i>    | 2.4016876401 |   |
| <i>K01A2.4</i>  | 2.3964880149 |   |
| <i>C54C8.4</i>  | 2.3958306964 |   |
| <i>Y49G5A.1</i> | 2.3946795222 |   |
| <i>C54E4.12</i> | 2.3946795222 |   |
| <i>T20D4.10</i> | 2.3916306277 |   |
| <i>H41C03.1</i> | 2.3914262166 | + |
| <i>lys-4</i>    | 2.3892643115 | + |
| <i>col-128</i>  | 2.3884742206 |   |
| <i>pef-1</i>    | 2.3855957336 |   |
| <i>C09G1.2</i>  | 2.3828790544 |   |
| <i>C06B3.6</i>  | 2.3732685731 | + |
| <i>slc-36.3</i> | 2.3716439740 | + |
| <i>ZC13.10</i>  | 2.3708834672 |   |
| <i>cutl-14</i>  | 2.3675649118 | + |
| <i>F20A1.6</i>  | 2.3668343822 | + |
| <i>T04C12.8</i> | 2.3635632324 |   |
| <i>C02G6.3</i>  | 2.3619589457 |   |
| <i>K09C4.4</i>  | 2.3614111123 |   |
| <i>mam-5</i>    | 2.3609539691 |   |
| <i>unk-1</i>    | 2.3583999634 |   |
| <i>gcy-3</i>    | 2.3553093991 |   |
| <i>lag-2</i>    | 2.3551011637 | + |
| <i>K09F6.11</i> | 2.3551011637 |   |
| <i>tax-2</i>    | 2.3505221167 |   |
| <i>F26F12.3</i> | 2.3453436896 |   |
| <i>nas-23</i>   | 2.3414832324 |   |
| <i>ugt-52</i>   | 2.3403840238 |   |
| <i>C17F4.2</i>  | 2.3384737091 | + |
| <i>mltn-3</i>   | 2.3335200894 |   |
| <i>mlt-11</i>   | 2.3327962272 |   |
| <i>cdh-7</i>    | 2.3306483894 |   |
| Y46G5A.36       | 2.3299751708 |   |
| <i>ZC443.4</i>  | 2.3294718494 |   |
| <i>C30B5.6</i>  | 2.3288449053 |   |
| <i>K09F6.10</i> | 2.3281364692 |   |
| <i>K02H11.4</i> | 2.3273765150 |   |
| <i>npax-1</i>   | 2.3258582311 | + |
| <i>F26G1.10</i> | 2.3255300982 |   |
| <i>C34F6.1</i>  | 2.3252494152 |   |
| <i>ZK54.3</i>   | 2.3243932679 |   |
| <i>F33H2.8</i>  | 2.3241470380 |   |
| <i>C05C8.8</i>  | 2.3209931414 |   |

|                   |              |   |
|-------------------|--------------|---|
| <i>col-176</i>    | 2.3209720923 |   |
| <i>odr-1</i>      | 2.3201754551 |   |
| <i>K10C9.1</i>    | 2.3201754551 |   |
| <i>fut-2</i>      | 2.3170652982 |   |
| <i>best-5</i>     | 2.3156212335 |   |
| <i>srg-7</i>      | 2.3155882891 |   |
| <i>hil-7</i>      | 2.3136625806 | + |
| <i>acdh-2</i>     | 2.3086482336 |   |
| <i>grl-22</i>     | 2.3078294969 |   |
| <i>F57G12.2</i>   | 2.3039105184 |   |
| <i>R11G1.7</i>    | 2.2999931889 | + |
| <i>acdh-1</i>     | 2.2996829474 | + |
| <i>F35F10.1</i>   | 2.2987133546 |   |
| <i>Y110A2AL.9</i> | 2.2978235762 |   |
| <i>aat-8</i>      | 2.2925483972 |   |
| <i>col-89</i>     | 2.2894731639 |   |
| <i>nlp-2</i>      | 2.2887596935 |   |
| <i>pals-1</i>     | 2.2887250351 |   |
| <i>C15C8.8</i>    | 2.2887111737 | + |
| <i>lgc-1</i>      | 2.2887111737 | + |
| <i>B0462.5</i>    | 2.2872964350 |   |
| <i>F38E11.6</i>   | 2.2856362742 | + |
| <i>zmp-2</i>      | 2.2849107617 | + |
| <i>cdh-10</i>     | 2.2847767177 |   |
| <i>del-8</i>      | 2.2841644919 |   |
| <i>T01D3.3</i>    | 2.2840786037 |   |
| <i>T17H7.1</i>    | 2.2826254610 |   |
| <i>acs-21</i>     | 2.2819626869 |   |
| <i>dpy-9</i>      | 2.2808587434 |   |
| <i>C39B5.14</i>   | 2.2796756784 |   |
| <i>tyr-1</i>      | 2.2796367427 | + |
| <i>ptr-10</i>     | 2.2786479532 | + |
| <i>bus-1</i>      | 2.2780565195 |   |
| <i>aptf-1</i>     | 2.2773193488 |   |
| <i>F47H4.2</i>    | 2.2769500652 |   |
| <i>twk-7</i>      | 2.2766811583 |   |
| <i>K09H11.6</i>   | 2.2755733131 |   |
| <i>ubc-8</i>      | 2.2750625660 |   |
| <i>F52C9.5</i>    | 2.2742605661 |   |
| <i>T04H1.12</i>   | 2.2729113327 |   |
| <i>ddn-1</i>      | 2.2721499576 |   |
| <i>C06G3.3</i>    | 2.2706492851 |   |
| <i>F35D2.6</i>    | 2.2685753062 |   |
| <i>C07A4.2</i>    | 2.2631435585 |   |
| <i>grl-10</i>     | 2.2626164151 | + |
| <i>fbn-1</i>      | 2.2621135832 |   |
| <i>srd-49</i>     | 2.2612732331 |   |
| <i>T10G3.1</i>    | 2.2587682036 |   |
| <i>EGAP4.1</i>    | 2.2568276271 |   |
| <i>Y46E12BR.1</i> | 2.2560217382 |   |
| <i>C07F11.2</i>   | 2.2557574139 |   |
| <i>T28F4.5</i>    | 2.2556406284 | + |
| <i>rml-3</i>      | 2.2528300133 |   |
| <i>R04E5.7</i>    | 2.2515786055 |   |
| <i>Y2H9A.4</i>    | 2.2503006160 |   |
| <i>myrf-1</i>     | 2.2500578947 | + |

|                  |              |   |
|------------------|--------------|---|
| <i>scl-5</i>     | 2.2472657916 |   |
| Y37A1B.7         | 2.2428023247 | + |
| <i>nhr-113</i>   | 2.2427917870 |   |
| K08F9.1          | 2.2407204338 |   |
| <i>lipl-2</i>    | 2.2397615242 |   |
| B0554.7          | 2.2390951276 |   |
| W09G12.7         | 2.2361384449 |   |
| <i>his-7</i>     | 2.2358171834 | + |
| <i>maph-9</i>    | 2.2349582985 | + |
| <i>cllec-72</i>  | 2.2336828506 |   |
| <i>math-28</i>   | 2.2333291197 |   |
| B0294.1          | 2.2314835948 |   |
| <i>lpr-1</i>     | 2.2312624094 | + |
| T21B4.15         | 2.2308737788 |   |
| <i>fkf-7</i>     | 2.2306770330 |   |
| T22F7.3          | 2.2295445806 |   |
| C05E11.7         | 2.2293894901 |   |
| F48G7.10         | 2.2267503808 | + |
| T02G5.3          | 2.2252412122 | + |
| T04C12.7         | 2.2235057618 |   |
| F26A1.8          | 2.2234232841 |   |
| R03H10.2         | 2.2228749765 |   |
| <i>droe-4</i>    | 2.2169954775 |   |
| T27F6.8          | 2.2163551154 | + |
| C54D10.9         | 2.2161855079 |   |
| Y71G12B.32       | 2.2147025415 |   |
| <i>ztf-14</i>    | 2.2135530940 |   |
| F54B11.10        | 2.2121314874 |   |
| ZC84.6           | 2.2111610274 |   |
| <i>fbxa-30</i>   | 2.2103892206 |   |
| K06A9.2          | 2.2078008819 |   |
| F20C5.5          | 2.2020196727 | + |
| F09C6.11         | 2.1947352358 |   |
| <i>cllec-169</i> | 2.1942125835 |   |
| Y4C6B.4          | 2.1940024791 |   |
| <i>cllec-47</i>  | 2.1935839562 |   |
| C06C3.12         | 2.1899966112 |   |
| <i>daao-1</i>    | 2.1881077802 |   |
| <i>nhr-19</i>    | 2.1852061255 |   |
| C30F2.4          | 2.1841963847 |   |
| <i>dod-20</i>    | 2.1835545695 |   |
| <i>his-64</i>    | 2.1833983515 | + |
| <i>nhr-263</i>   | 2.1796474090 | + |
| T20B3.1          | 2.1795846271 |   |
| C17G10.7         | 2.1792089481 | + |
| <i>fbxl-1</i>    | 2.1783229968 | + |
| <i>nhr-157</i>   | 2.1762281293 |   |
| <i>lgmn-1</i>    | 2.1761360774 |   |
| T08G5.15         | 2.1757627398 |   |
| C48D5.3          | 2.1736987897 |   |
| C17F4.3          | 2.1695889510 |   |
| Y105E8A.13       | 2.1673801012 | + |
| C08D8.1          | 2.1662611786 |   |
| <i>lys-7</i>     | 2.1662331087 | + |
| <i>aakg-4</i>    | 2.1651705419 |   |
| F57C9.6          | 2.1625795876 | + |

|                 |              |   |
|-----------------|--------------|---|
| <i>nas-4</i>    | 2.1619733944 | + |
| Y73B6BL.44      | 2.1614313966 |   |
| <i>tsp-1</i>    | 2.1603451033 |   |
| <i>glb-21</i>   | 2.1582754915 |   |
| F13G3.3         | 2.1535106452 |   |
| <i>acer-1</i>   | 2.1520368438 | + |
| <i>fat-5</i>    | 2.1485948155 |   |
| <i>spp-18</i>   | 2.1474003899 |   |
| T12A7.6         | 2.1461467758 |   |
| R07E3.6         | 2.1460986072 |   |
| <i>nhr-150</i>  | 2.1456102571 |   |
| F42C5.4         | 2.1445171734 |   |
| <i>cup-16</i>   | 2.1431391617 |   |
| <i>let-4</i>    | 2.1428546910 |   |
| C08F11.3        | 2.1414852618 |   |
| R05H5.7         | 2.1409566472 |   |
| <i>igdb-3</i>   | 2.1401893430 | + |
| C25E10.16       | 2.1399101245 |   |
| <i>tsp-2</i>    | 2.1380267344 |   |
| F47B8.2         | 2.1369889194 |   |
| F21H7.12        | 2.1360138933 | + |
| <i>ztf-30</i>   | 2.1352461083 |   |
| F28G4.2         | 2.1345898519 |   |
| <i>clcc-82</i>  | 2.1343130569 |   |
| Y23H5B.3        | 2.1333341951 |   |
| <i>arl-3</i>    | 2.1293446765 |   |
| <i>dpy-7</i>    | 2.1280993019 |   |
| <i>wrt-2</i>    | 2.1263242492 |   |
| T14B4.19        | 2.1214765465 |   |
| R13H4.7         | 2.1174564280 |   |
| <i>igcm-1</i>   | 2.1167367759 |   |
| K02E10.5        | 2.1158035388 |   |
| <i>his-21</i>   | 2.1138129048 | + |
| F44G3.10        | 2.1124946094 |   |
| <i>hsp-12.3</i> | 2.1114617620 |   |
| <i>clcc-194</i> | 2.1097512979 |   |
| W08E12.3        | 2.1079336281 |   |
| C27H5.6         | 2.1077641857 | + |
| ZK757.1         | 2.1052528258 |   |
| <i>dhs-16</i>   | 2.1045015150 |   |
| <i>sru-40</i>   | 2.1009598220 |   |
| Y65B4BL.1       | 2.1002766203 | + |
| C45G7.4         | 2.0979512952 | + |
| K02E10.4        | 2.0957493217 |   |
| <i>dpy-8</i>    | 2.0949820493 |   |
| K02F6.8         | 2.0941927383 |   |
| <i>frpr-10</i>  | 2.0941927383 |   |
| <i>acc-1</i>    | 2.0934299475 | + |
| <i>oac-29</i>   | 2.0910069059 |   |
| F35D2.1         | 2.0906578903 |   |
| Y44A6C.1        | 2.0898692106 |   |
| ZK971.1         | 2.0877245084 |   |
| W03D8.8         | 2.0871878992 |   |
| Y43C5A.3        | 2.0869477994 |   |
| C09F9.2         | 2.0859643287 |   |
| <i>nlp-52</i>   | 2.0818294871 |   |

|                  |              |   |
|------------------|--------------|---|
| <i>dpy-10</i>    | 2.0807023821 | + |
| <i>ceh-2</i>     | 2.0796515028 | + |
| <i>nhr-227</i>   | 2.0796515028 |   |
| <i>F59G1.4</i>   | 2.0784703624 | + |
| <i>atf-2</i>     | 2.0778348155 |   |
| <i>otpl-5</i>    | 2.0767327158 |   |
| <i>ttr-23</i>    | 2.0757595556 |   |
| <i>fbxa-158</i>  | 2.0731835404 |   |
| <i>F20C5.6</i>   | 2.0702871661 | + |
| <i>fkh-8</i>     | 2.0699887203 |   |
| <i>faah-6</i>    | 2.0688921572 |   |
| <i>Y54G2A.76</i> | 2.0683825217 |   |
| <i>twk-11</i>    | 2.0679153445 |   |
| <i>F01G10.6</i>  | 2.0653317240 |   |
| <i>ZC449.2</i>   | 2.0650589740 | + |
| <i>ztf-2</i>     | 2.0617471934 |   |
| <i>F25E5.8</i>   | 2.0593689213 | + |
| <i>wht-1</i>     | 2.0591755212 |   |
| <i>oac-24</i>    | 2.0579598205 |   |
| <i>C06E4.8</i>   | 2.0569468283 | + |
| <i>igcm-2</i>    | 2.0536678721 | + |
| <i>mltn-8</i>    | 2.0532439356 |   |
| <i>E04F6.9</i>   | 2.0522750021 |   |
| <i>Y41G9A.5</i>  | 2.0521487722 |   |
| <i>marc-5</i>    | 2.0518473864 |   |
| <i>math-15</i>   | 2.0468956945 |   |
| <i>cest-29</i>   | 2.0468956945 |   |
| <i>tag-272</i>   | 2.0448050941 |   |
| <i>bus-12</i>    | 2.0447473102 |   |
| <i>talp-3</i>    | 2.0417601545 |   |
| <i>hil-3</i>     | 2.0413895383 | + |
| <i>C15C8.5</i>   | 2.0411656681 |   |
| <i>fozi-1</i>    | 2.0405655276 | + |
| <i>dpf-6</i>     | 2.0378321278 |   |
| <i>T13C5.3</i>   | 2.0369924593 | + |
| <i>H03E18.1</i>  | 2.0361361166 |   |
| <i>trpl-3</i>    | 2.0339552952 |   |
| <i>K10D3.4</i>   | 2.0333957554 |   |
| <i>col-172</i>   | 2.0307793706 |   |
| <i>osr-1</i>     | 2.0303629223 |   |
| <i>iron-1</i>    | 2.0301874687 |   |
| <i>clcc-75</i>   | 2.0282557538 |   |
| <i>K10H10.5</i>  | 2.0280001182 |   |
| <i>C14A4.9</i>   | 2.0265512716 | + |
| <i>R03H10.7</i>  | 2.0263001533 | + |
| <i>clcc-180</i>  | 2.0262390626 |   |
| <i>nhr-68</i>    | 2.0254352939 |   |
| <i>C15A7.2</i>   | 2.0252427859 |   |
| <i>C29F9.2</i>   | 2.0248688737 |   |
| <i>M01H9.3</i>   | 2.0221375622 | + |
| <i>ZK593.2</i>   | 2.0218210480 |   |
| <i>F57F5.3</i>   | 2.0211232383 | + |
| <i>B0348.2</i>   | 2.0193690876 |   |
| <i>noah-2</i>    | 2.0179281231 |   |
| <i>F13H6.5</i>   | 2.0158831310 |   |
| <i>cutl-21</i>   | 2.0135019565 |   |

|                   |                |   |
|-------------------|----------------|---|
| <i>T26C5.2</i>    | 2.0113781791   |   |
| <i>col-111</i>    | 2.0071525906   |   |
| <i>spi-1</i>      | 2.0071351283   | + |
| <i>lpr-5</i>      | 2.0070436921   |   |
| <i>F45D3.4</i>    | 2.0067508087   | + |
| <i>dgk-3</i>      | 2.0065024720   |   |
| <i>Y64H9A.2</i>   | 2.0045578060   | + |
| <i>dex-1</i>      | 2.0027527073   |   |
| <i>R11D1.2</i>    | 2.0011049682   |   |
| <i>sup-26</i>     | 2.0007826429   | + |
| <i>pzf-1</i>      | -11.1774448148 | + |
| <i>F43G6.7</i>    | -10.2633281267 | + |
| <i>vet-2</i>      | -10.1308033891 | + |
| <i>M151.3</i>     | -9.6544046392  | + |
| <i>T25E12.6</i>   | -9.4298331635  | + |
| <i>nspe-6</i>     | -9.3768002659  |   |
| <i>F31F6.1</i>    | -9.3029138949  | + |
| <i>T24E12.1</i>   | -9.2645014786  | + |
| <i>Y67D8B.3</i>   | -9.0997265377  |   |
| <i>skr-15</i>     | -8.8631568291  | + |
| <i>btb-7</i>      | -8.8631568291  | + |
| <i>fbxc-42</i>    | -8.8631568291  | + |
| <i>F17A2.13</i>   | -8.8372179490  | + |
| <i>Y71A12B.23</i> | -8.8108041499  |   |
| <i>ceh-40</i>     | -8.8108041499  | + |
| <i>C45H4.14</i>   | -8.6709542721  | + |
| <i>B0281.5</i>    | -8.6709542721  | + |
| <i>enri-2</i>     | -8.5484121234  | + |
| <i>skr-13</i>     | -8.5484121234  | + |
| <i>F02D10.6</i>   | -8.5160782207  | + |
| <i>gadr-2</i>     | -8.4830029993  | + |
| <i>C47F8.1</i>    | -8.4491516677  | + |
| <i>C46E10.8</i>   | -8.4491516677  | + |
| <i>F26G5.1</i>    | -6.5215988549  | + |
| <i>F12E12.1</i>   | -6.1538236661  | + |
| <i>vit-4</i>      | -5.9935456841  | + |
| <i>vit-3</i>      | -5.8797465248  | + |
| <i>F19H6.4</i>    | -5.8275202988  | + |
| <i>K04C1.5</i>    | -5.7843894820  | + |
| <i>W06D11.3</i>   | -5.6073442481  | + |
| <i>vet-1</i>      | -5.5227437483  |   |
| <i>skr-7</i>      | -5.4362779396  | + |
| <i>skr-14</i>     | -5.4244747282  | + |
| <i>C17E7.4</i>    | -5.4231019319  | + |
| <i>spp-9</i>      | -5.4132165616  |   |
| <i>T02G6.5</i>    | -5.3417345260  | + |
| <i>sea-1</i>      | -5.3066529512  | + |
| <i>nhr-2</i>      | -5.2875593676  | + |
| <i>tbx-33</i>     | -5.2632531735  | + |
| <i>F23D12.2</i>   | -5.2485969669  | + |
| <i>ceh-49</i>     | -5.2214397080  | + |
| <i>ztf-25</i>     | -5.1681058736  | + |
| <i>meg-1</i>      | -5.1630464169  | + |
| <i>F22E5.17</i>   | -5.1034300489  | + |
| <i>ZK177.1</i>    | -5.0583494280  | + |
| <i>R04D3.3</i>    | -5.0447251073  | + |



|                  |               |   |
|------------------|---------------|---|
| <i>F53F8.3</i>   | -5.0413664034 | + |
| <i>meg-4</i>     | -4.9991678730 | + |
| <i>R04D3.4</i>   | -4.9965275296 | + |
| <i>fkh-3</i>     | -4.9830693602 | + |
| <i>sri-40</i>    | -4.9282444734 | + |
| <i>Y47D7A.7</i>  | -4.8919963894 |   |
| <i>fbxa-170</i>  | -4.8792988203 | + |
| <i>Y45F10C.2</i> | -4.8669746296 |   |
| <i>cdc-25.3</i>  | -4.8032298663 | + |
| <i>rgs-11</i>    | -4.7650235855 | + |
| <i>C01G6.3</i>   | -4.7486386227 | + |
| <i>Y53G8AM.4</i> | -4.7460875262 |   |
| <i>C31G12.1</i>  | -4.7452483472 | + |
| <i>C49F5.3</i>   | -4.7136882337 | + |
| <i>F54F7.6</i>   | -4.6888702331 | + |
| <i>fbxc-32</i>   | -4.6886013864 | + |
| <i>dod-21</i>    | -4.6816682629 |   |
| <i>F22F4.5</i>   | -4.6694197939 |   |
| <i>vit-1</i>     | -4.6463114377 | + |
| <i>C04B4.2</i>   | -4.6419930617 | + |
| <i>ent-5</i>     | -4.6341622665 | + |
| <i>Y75D11A.3</i> | -4.6073368299 | + |
| <i>ccch-5</i>    | -4.5713231728 |   |
| <i>C32H11.9</i>  | -4.5496800065 |   |
| <i>Y57G11B.5</i> | -4.5263757701 |   |
| <i>vit-5</i>     | -4.5193713066 | + |
| <i>dod-23</i>    | -4.4731902387 | + |
| <i>F02E8.4</i>   | -4.4557792139 | + |
| <i>C17E7.12</i>  | -4.4347147307 | + |
| <i>F14H3.6</i>   | -4.4275385940 | + |
| <i>rgs-9</i>     | -4.4213025806 | + |
| <i>ssp-19</i>    | -4.4179515416 | + |
| <i>F14H3.3</i>   | -4.3961166559 | + |
| <i>R09F10.8</i>  | -4.3796469563 | + |
| <i>F08F3.6</i>   | -4.3354014800 | + |
| <i>btb-6</i>     | -4.3077954621 | + |
| <i>F56D6.12</i>  | -4.2837592825 |   |
| <i>meg-2</i>     | -4.2690786513 | + |
| <i>ugt-63</i>    | -4.2321801170 | + |
| <i>col-143</i>   | -4.2200246044 |   |
| <i>nos-2</i>     | -4.2172268064 | + |
| <i>lsy-27</i>    | -4.2033589019 | + |
| <i>ttr-42</i>    | -4.1905535208 | + |
| <i>Y62H9A.3</i>  | -4.1861682490 |   |
| <i>F40G12.11</i> | -4.1833517001 | + |
| <i>T12G3.6</i>   | -4.1691701320 | + |
| <i>C08F11.12</i> | -4.1577868350 | + |
| <i>F31F6.2</i>   | -4.1561648155 | + |
| <i>F31B9.3</i>   | -4.1391411618 | + |
| <i>Y41C4A.32</i> | -4.1353933186 |   |
| <i>F31F6.3</i>   | -4.1334492697 | + |
| <i>tbx-36</i>    | -4.1333316875 | + |
| <i>Y47D7A.6</i>  | -4.1262639282 |   |
| <i>T24E12.11</i> | -4.1262639282 | + |
| <i>Y62H9A.5</i>  | -4.1206067583 | + |
| <i>tbx-9</i>     | -4.1142879654 | + |

|                |               |   |
|----------------|---------------|---|
| K03A11.1       | -4.1049481388 |   |
| <i>ule-5</i>   | -4.0747783353 | + |
| F14H3.4        | -4.0655692738 | + |
| W02D9.6        | -4.0514840802 |   |
| C50E3.12       | -4.0507097543 | + |
| F15A4.10       | -4.0145799353 | + |
| R05G9.3        | -4.0118468562 | + |
| C50E3.11       | -4.0111444176 | + |
| M151.7         | -4.0001688007 | + |
| <i>nspb-4</i>  | -3.9979798300 | + |
| F14H3.5        | -3.9815615586 | + |
| Y17G7B.19      | -3.9758648924 |   |
| E02H4.6        | -3.9691717190 | + |
| <i>rgs-8.2</i> | -3.9681515514 |   |
| <i>rgs-8.1</i> | -3.9502430491 | + |
| Y25C1A.14      | -3.9477598034 |   |
| T04D3.1        | -3.9443185563 | + |
| <i>meg-3</i>   | -3.9432423472 | + |
| <i>puf-5</i>   | -3.9418253568 | + |
| T06D4.1        | -3.9406935892 | + |
| <i>oac-20</i>  | -3.9333189408 |   |
| F14D7.2        | -3.9078952898 | + |
| C27C12.3       | -3.9061755736 | + |
| ZK829.9        | -3.9057039619 | + |
| Y105C5B.20     | -3.8935191344 | + |
| <i>msrp-5</i>  | -3.8605208958 | + |
| <i>fbxc-50</i> | -3.8538622633 | + |
| T01G5.7        | -3.8333096232 | + |
| C46C2.5        | -3.7987387064 | + |
| R09A8.2        | -3.7837127712 | + |
| <i>nas-27</i>  | -3.7725123255 |   |
| R09A8.1        | -3.7695233186 | + |
| <i>try-1</i>   | -3.7674181319 | + |
| C50E3.13       | -3.7640536911 | + |
| F19B10.5       | -3.7474439558 | + |
| F02H6.2        | -3.7442256027 | + |
| F39F10.3       | -3.7311518831 | + |
| <i>clcc-91</i> | -3.7125635486 | + |
| <i>hrg-4</i>   | -3.7078930972 | + |
| <i>oma-2</i>   | -3.6812680964 | + |
| B0513.4        | -3.6811584477 | + |
| F43G6.10       | -3.6799822369 | + |
| <i>clcc-87</i> | -3.6798426507 | + |
| <i>fkh-4</i>   | -3.6758358394 | + |
| <i>perm-2</i>  | -3.6661249399 | + |
| F49F1.7        | -3.6365555519 |   |
| <i>egg-1</i>   | -3.6310050837 | + |
| <i>pos-1</i>   | -3.6248474318 | + |
| <i>ule-3</i>   | -3.6160973921 | + |
| <i>ule-1</i>   | -3.6145763851 | + |
| Y49F6C.8       | -3.5968826578 | + |
| R04D3.2        | -3.5906460588 | + |
| Y51F10.2       | -3.5711492836 | + |
| Y66A7A.9       | -3.5532936906 |   |
| C17E7.9        | -3.5523342654 | + |
| K08H2.3        | -3.5374546715 | + |

|                    |               |   |
|--------------------|---------------|---|
| <i>F02H6.3</i>     | -3.5340470364 | + |
| <i>B0416.4</i>     | -3.5128181174 | + |
| <i>K04G2.10</i>    | -3.5061457201 | + |
| <i>Y54F10AM.11</i> | -3.5021924974 | + |
| <i>vit-2</i>       | -3.4912748708 | + |
| <i>cyp-13B2</i>    | -3.4878845665 | + |
| <i>F42A10.7</i>    | -3.4873687493 |   |
| <i>ZC373.2</i>     | -3.4872090154 |   |
| <i>msp-63</i>      | -3.4868185111 | + |
| <i>W02D9.7</i>     | -3.4786288080 |   |
| <i>D1054.10</i>    | -3.4758012779 | + |
| <i>drd-50</i>      | -3.4631137428 |   |
| <i>19H5.7</i>      | -3.4540332349 |   |
| <i>cpg-1</i>       | -3.4416082457 | + |
| <i>T01C3.3</i>     | -3.4313282764 | + |
| <i>K10C2.8</i>     | -3.4302413145 | + |
| <i>msrp-6</i>      | -3.4277548274 | + |
| <i>msp-49</i>      | -3.4259157466 | + |
| <i>C35E7.5</i>     | -3.4227141895 | + |
| <i>era-1</i>       | -3.4152081936 | + |
| <i>rme-2</i>       | -3.4036931691 | + |
| <i>flh-3</i>       | -3.3991329705 | + |
| <i>gln-5</i>       | -3.3979437123 | + |
| <i>col-8</i>       | -3.3977458210 | + |
| <i>cpg-2</i>       | -3.3925823244 | + |
| <i>perm-4</i>      | -3.3914309966 | + |
| <i>gfat-2</i>      | -3.3885183552 | + |
| <i>msp-50</i>      | -3.3871602105 | + |
| <i>Y53H1C.3</i>    | -3.3859107046 |   |
| <i>F54D10.7</i>    | -3.3808592826 | + |
| <i>cpg-3</i>       | -3.3797979056 | + |
| <i>T15H9.5</i>     | -3.3744162157 |   |
| <i>ZC412.8</i>     | -3.3733648480 |   |
| <i>W05F2.3</i>     | -3.3730085882 | + |
| <i>scl-17</i>      | -3.3703196954 |   |
| <i>nspe-1</i>      | -3.3559520196 |   |
| <i>col-178</i>     | -3.3519573293 | + |
| <i>C05C10.5</i>    | -3.3506590140 | + |
| <i>H12D21.3</i>    | -3.3487534982 |   |
| <i>col-20</i>      | -3.3476986063 | + |
| <i>K09E3.7</i>     | -3.3194920403 | + |
| <i>col-137</i>     | -3.3096226744 | + |
| <i>ceh-83</i>      | -3.3014332912 | + |
| <i>C01G8.1</i>     | -3.2954135406 | + |
| <i>puf-3</i>       | -3.2953127976 | + |
| <i>col-119</i>     | -3.2897527378 | + |
| <i>ZK813.1</i>     | -3.2830469633 |   |
| <i>ZK813.3</i>     | -3.2771905405 |   |
| <i>ZC190.7</i>     | -3.2730227804 |   |
| <i>clec-97</i>     | -3.2729596845 |   |
| <i>Y37D8A.19</i>   | -3.2592806148 | + |
| <i>Y62H9A.4</i>    | -3.2563647815 | + |
| <i>ZC308.4</i>     | -3.2527660911 | + |
| <i>mex-1</i>       | -3.2466605892 | + |
| <i>ssp-33</i>      | -3.2464224871 | + |
| <i>vit-6</i>       | -3.2367408169 | + |

|                 |               |   |
|-----------------|---------------|---|
| <i>nspg-7.2</i> | -3.2281980268 |   |
| <i>BE10.5</i>   | -3.2189901082 |   |
| <i>chs-1</i>    | -3.2134174953 | + |
| <i>C24D10.5</i> | -3.2081075866 | + |
| <i>T20B6.1</i>  | -3.1914218039 |   |
| <i>F08B4.8</i>  | -3.1910169167 |   |
| <i>msp-38</i>   | -3.1887677540 | + |
| <i>T21C9.13</i> | -3.1863760093 | + |
| <i>col-181</i>  | -3.1828401867 | + |
| <i>egg-3</i>    | -3.1821654172 | + |
| <i>C45B2.1</i>  | -3.1749035402 | + |
| <i>gyg-2</i>    | -3.1721911633 | + |
| <i>W06D11.1</i> | -3.1656571697 | + |
| <i>nspc-2</i>   | -3.1629117705 |   |
| <i>col-179</i>  | -3.1619609329 |   |
| <i>egg-5</i>    | -3.1590712539 | + |
| <i>F08H9.2</i>  | -3.1537863820 | + |
| <i>ssp-10</i>   | -3.1496284082 | + |
| <i>memi-3</i>   | -3.1483004267 | + |
| <i>col-101</i>  | -3.1453615303 | + |
| <i>K08C9.1</i>  | -3.1451787101 | + |
| <i>F36D1.4</i>  | -3.1411810336 |   |
| <i>EEED8.3</i>  | -3.1231406369 | + |
| <i>Y4C6A.3</i>  | -3.1213828989 | + |
| <i>msp-65</i>   | -3.1207249845 | + |
| <i>msp-58</i>   | -3.1115679607 | + |
| <i>C10G8.4</i>  | -3.1077775123 | + |
| <i>msp-64</i>   | -3.1029743840 | + |
| <i>col-122</i>  | -3.0934352907 |   |
| <i>cyb-2.2</i>  | -3.0918937257 | + |
| <i>col-140</i>  | -3.0882223557 |   |
| <i>F58A6.9</i>  | -3.0833479223 |   |
| <i>col-80</i>   | -3.0802756965 | + |
| <i>puf-11</i>   | -3.0776611955 | + |
| <i>C30G12.2</i> | -3.0760222242 |   |
| <i>col-96</i>   | -3.0712689214 |   |
| <i>C04H5.7</i>  | -3.0675269940 | + |
| <i>T10B5.8</i>  | -3.0648261667 |   |
| <i>egg-2</i>    | -3.0563644857 | + |
| <i>F53F4.18</i> | -3.0545144953 |   |
| <i>lido-12</i>  | -3.0543205355 | + |
| <i>ssq-1</i>    | -3.0521096423 | + |
| <i>Y39E4B.5</i> | -3.0487950911 | + |
| <i>mesp-1</i>   | -3.0478836942 | + |
| <i>col-142</i>  | -3.0432025404 |   |
| <i>col-124</i>  | -3.0385009029 | + |
| <i>mrac-3</i>   | -3.0245255086 | + |
| <i>T10C6.7</i>  | -3.0217708187 | + |
| <i>F55B11.3</i> | -3.0178868614 | + |
| <i>msp-76</i>   | -3.0166694515 | + |
| <i>T09B4.3</i>  | -3.0113874932 |   |
| <i>ht-3</i>     | -3.0042100846 | + |
| <i>T22B7.7</i>  | -2.9994538638 |   |
| <i>mex-6</i>    | -2.9990230006 | + |
| <i>nspc-5</i>   | -2.9941897842 |   |
| <i>F10D11.3</i> | -2.9926401377 | + |

|                  |               |   |
|------------------|---------------|---|
| <i>clec-88</i>   | -2.9911382635 | + |
| <i>C29F7.10</i>  | -2.9901652087 | + |
| <i>msp-152</i>   | -2.9868148646 | + |
| <i>F32D1.7</i>   | -2.9824727734 | + |
| <i>nep-7</i>     | -2.9816920808 |   |
| <i>nsph-4.1</i>  | -2.9694438069 |   |
| <i>clec-175</i>  | -2.9626497281 | + |
| <i>msrp-4</i>    | -2.9583976169 |   |
| <i>F48E3.4</i>   | -2.9573154700 | + |
| <i>C06C6.7</i>   | -2.9459181580 | + |
| <i>T27A8.2</i>   | -2.9455763417 | + |
| <i>F22E5.1</i>   | -2.9423691040 |   |
| <i>gln-6</i>     | -2.9383360692 | + |
| <i>nspd-2</i>    | -2.9382598092 | + |
| <i>msp-78</i>    | -2.9377192272 | + |
| <i>col-19</i>    | -2.9355248066 |   |
| <i>ZK813.2</i>   | -2.9295753958 |   |
| <i>msp-113</i>   | -2.9291854688 | + |
| <i>R102.8</i>    | -2.9246071935 | + |
| <i>ZK39.10</i>   | -2.9239203560 |   |
| <i>col-184</i>   | -2.9223342175 |   |
| <i>ZK813.7</i>   | -2.9192650039 |   |
| <i>T16G1.13</i>  | -2.9180804311 |   |
| <i>fbxb-67</i>   | -2.9170752108 | + |
| <i>msd-4</i>     | -2.9022231519 | + |
| <i>puf-7</i>     | -2.8994794145 | + |
| <i>Y71F9B.15</i> | -2.8982071873 |   |
| <i>H08M01.1</i>  | -2.8961247141 | + |
| <i>msp-59</i>    | -2.8959363772 | + |
| <i>C10A4.4</i>   | -2.8933727878 | + |
| <i>ssp-34</i>    | -2.8868768232 |   |
| <i>nspd-10</i>   | -2.8848366822 |   |
| <i>nspc-6</i>    | -2.8846107912 |   |
| <i>col-93</i>    | -2.8761579404 |   |
| <i>puf-6</i>     | -2.8704686705 | + |
| <i>Y38C1AA.7</i> | -2.8685230114 |   |
| <i>kca-1</i>     | -2.8676140674 | + |
| <i>spn-4</i>     | -2.8668186649 | + |
| <i>msp-33</i>    | -2.8667490803 | + |
| <i>nspd-4</i>    | -2.8643831134 |   |
| <i>msp-45</i>    | -2.8604437841 | + |
| <i>skpo-1</i>    | -2.8547272490 | + |
| <i>W10G11.3</i>  | -2.8491714695 |   |
| <i>msp-3</i>     | -2.8472284256 | + |
| <i>nspe-2</i>    | -2.8471751271 | + |
| <i>T11F8.1</i>   | -2.8448125477 | + |
| <i>gna-2</i>     | -2.8430123676 | + |
| <i>msp-77</i>    | -2.8426011828 | + |
| <i>C39D10.7</i>  | -2.8400677470 | + |
| <i>col-106</i>   | -2.8388910487 |   |
| <i>F18A1.7</i>   | -2.8363943546 | + |
| <i>msp-36</i>    | -2.8250078044 | + |
| <i>ZK402.5</i>   | -2.8227956663 | + |
| <i>ssp-9</i>     | -2.8199359948 | + |
| <i>msp-10</i>    | -2.8185400383 | + |
| <i>ssq-2</i>     | -2.8170039212 |   |

|                    |               |   |
|--------------------|---------------|---|
| <i>K07A1.6</i>     | -2.8121380989 | + |
| <i>msrp-3</i>      | -2.8095233309 | + |
| <i>cbd-1</i>       | -2.8089157034 | + |
| <i>Y75B12B.1</i>   | -2.8022167887 | + |
| <i>cpar-1</i>      | -2.7982284683 | + |
| <i>ssq-4</i>       | -2.7961572249 |   |
| <i>nspc-1</i>      | -2.7960241360 |   |
| <i>R03G8.6</i>     | -2.7957110258 |   |
| <i>F34D10.8</i>    | -2.7953005350 | + |
| <i>F36D3.16</i>    | -2.7899320535 |   |
| <i>col-81</i>      | -2.7854878564 |   |
| <i>srg-10</i>      | -2.7841591848 |   |
| <i>F17E9.5</i>     | -2.7760771715 | + |
| <i>F55B11.2</i>    | -2.7753224019 | + |
| <i>Y48B6A.10</i>   | -2.7660440233 | + |
| <i>rmd-1</i>       | -2.7654617323 | + |
| <i>ssp-11</i>      | -2.7651795879 |   |
| <i>Y39F10C.3</i>   | -2.7616301842 |   |
| <i>Y51B9A.5</i>    | -2.7606334017 |   |
| <i>abu-2</i>       | -2.7606226962 |   |
| <i>C11E4.7</i>     | -2.7598892415 |   |
| <i>col-7</i>       | -2.7592776548 |   |
| <i>msp-79</i>      | -2.7588466196 | + |
| <i>dct-19</i>      | -2.7571150879 |   |
| <i>nspd-3</i>      | -2.7561933627 |   |
| <i>msp-51</i>      | -2.7548454037 | + |
| <i>T07E3.2</i>     | -2.7545485271 |   |
| <i>EEED8.15</i>    | -2.7489472870 | + |
| <i>H29C22.1</i>    | -2.7477803374 | + |
| <i>col-88</i>      | -2.7449079583 |   |
| <i>B0261.5</i>     | -2.7430142101 | + |
| <i>F57C2.4</i>     | -2.7401850466 | + |
| <i>F27C1.1</i>     | -2.7390188302 | + |
| <i>msp-142</i>     | -2.7371569543 | + |
| <i>msd-1</i>       | -2.7309270323 | + |
| <i>egg-4</i>       | -2.7303846224 | + |
| <i>spsb-2</i>      | -2.7290943423 | + |
| <i>nspe-4</i>      | -2.7278472039 | + |
| <i>nspd-5</i>      | -2.7270058627 | + |
| <i>C10C5.3</i>     | -2.7264804489 | + |
| <i>F53B6.4</i>     | -2.7251419472 | + |
| <i>mex-5</i>       | -2.7249365392 | + |
| <i>Y73B6BL.288</i> | -2.7228533197 | + |
| <i>col-133</i>     | -2.7219218825 |   |
| <i>sss-1</i>       | -2.7187272035 | + |
| <i>C44B7.5</i>     | -2.7180654426 | + |
| <i>C33F10.1</i>    | -2.7169821460 |   |
| <i>R04A9.9</i>     | -2.7163643283 |   |
| <i>F21H7.5</i>     | -2.7112954860 | + |
| <i>Y45F10C.4</i>   | -2.7023027981 |   |
| <i>irld-18</i>     | -2.7012194676 |   |
| <i>34I24.1</i>     | -2.7001671169 | + |
| <i>nspd-1</i>      | -2.6988967082 |   |
| <i>tdc-1</i>       | -2.6980445221 | + |
| <i>F36H2.6</i>     | -2.6939566159 |   |
| <i>Y106G6A.4</i>   | -2.6938915595 |   |

|                 |               |   |
|-----------------|---------------|---|
| <i>pqn-90</i>   | -2.6936192826 |   |
| Y51A2B.6        | -2.6933212700 |   |
| <i>ssp-37</i>   | -2.6924109207 |   |
| <i>msd-2</i>    | -2.6886839601 |   |
| <i>col-129</i>  | -2.6860744057 | + |
| <i>T27E7.1</i>  | -2.6854609570 | + |
| <i>col-139</i>  | -2.6838419470 |   |
| <i>nspd-7</i>   | -2.6834808913 |   |
| <i>msd-3</i>    | -2.6822254100 | + |
| <i>ubxn-5</i>   | -2.6789048239 |   |
| <i>ttr-50</i>   | -2.6785468712 | + |
| <i>memi-2</i>   | -2.6763809882 | + |
| K03B4.6         | -2.6742547707 |   |
| T08B2.12        | -2.6740302747 |   |
| K11D12.13       | -2.6730925709 | + |
| W06A7.4         | -2.6724518633 | + |
| F26B1.8         | -2.6699597614 |   |
| Y59E9AR.7       | -2.6690017071 | + |
| <i>memi-1</i>   | -2.6670946738 | + |
| Y47D3B.12       | -2.6661970549 |   |
| <i>oma-1</i>    | -2.6654302348 | + |
| T24D1.3         | -2.6644117420 | + |
| F53H4.2         | -2.6626259432 |   |
| <i>msp-31</i>   | -2.6589888419 | + |
| C48E7.7         | -2.6589743152 | + |
| F10C1.3         | -2.6579556345 | + |
| <i>szy-4</i>    | -2.6575725295 | + |
| <i>trcs-1</i>   | -2.6555813436 | + |
| <i>msp-19</i>   | -2.6537994870 | + |
| F41E6.1         | -2.6522689186 |   |
| W06B4.1         | -2.6487033550 | + |
| D1086.6         | -2.6469886080 |   |
| T04G9.7         | -2.6467269126 | + |
| K08D8.11        | -2.6442074362 |   |
| F56D6.19        | -2.6442074362 |   |
| F59A6.12        | -2.6411241189 | + |
| <i>nsph-4.2</i> | -2.6405105356 |   |
| C15C6.2         | -2.6394643366 | + |
| C34F11.2        | -2.6379468366 | + |
| Y59E9AR.1       | -2.6343908692 |   |
| <i>nspd-6</i>   | -2.6239371340 | + |
| <i>tbh-1</i>    | -2.6231812592 | + |
| D1086.11        | -2.6222303789 | + |
| <i>cyb-2.1</i>  | -2.6187883226 | + |
| C17F3.1         | -2.6152035506 | + |
| C34D4.3         | -2.6145964594 | + |
| <i>perm-1</i>   | -2.6144078719 | + |
| <i>clec-218</i> | -2.6093461173 |   |
| Y46B2A.4        | -2.6075320816 |   |
| <i>sysm-1</i>   | -2.6028201256 |   |
| <i>msp-81</i>   | -2.5988194148 | + |
| W03B1.3         | -2.5923472831 |   |
| C44B9.3         | -2.5903255376 | + |
| <i>nsph-3.2</i> | -2.5891792586 | + |
| Y71G12B.33      | -2.5842266011 |   |
| <i>rpl-42</i>   | -2.5795729413 | + |

|             |               |   |
|-------------|---------------|---|
| T10C6.10    | -2.5770444229 | + |
| col-62      | -2.5700535547 |   |
| Y67D8B.5    | -2.5676276764 |   |
| F36H12.5    | -2.5653292326 | + |
| Y69E1A.1    | -2.5583049789 |   |
| mpst-6      | -2.5549872267 |   |
| mpst-5      | -2.5513380829 |   |
| Y49E10.29   | -2.5502760879 |   |
| F58B4.7     | -2.5437574829 |   |
| Y53F4B.24   | -2.5419073370 |   |
| F55B11.5    | -2.5409990613 | + |
| msp-55      | -2.5380169031 | + |
| Y18D10A.11  | -2.5377829363 | + |
| Y52B11A.8   | -2.5372056108 | + |
| F59A1.13    | -2.5368556953 |   |
| C27D9.1     | -2.5359960788 | + |
| nasp-2      | -2.5325824779 | + |
| Y39G10AR.16 | -2.5324433459 |   |
| F49D11.14   | -2.5281374440 |   |
| W09C3.7     | -2.5258754850 |   |
| C30G7.4     | -2.5239857485 | + |
| D2045.5     | -2.5188990959 | + |
| Y39B6A.10   | -2.5175498873 | + |
| C45B11.8    | -2.5134537696 | + |
| Y38F2AR.10  | -2.5129120429 |   |
| cey-2       | -2.5109868659 | + |
| F36D3.4     | -2.5086663668 | + |
| B0025.5     | -2.5083518916 |   |
| C28D4.7     | -2.5042944424 | + |
| B0524.2     | -2.5030932029 | + |
| C18G1.9     | -2.5025437966 | + |
| F52F12.8    | -2.5007035855 | + |
| ZK1307.4    | -2.4989318597 |   |
| F35H8.4     | -2.4971346206 | + |
| nsph-3.1    | -2.4965383746 |   |
| lido-9      | -2.4963790469 | + |
| R09E10.6    | -2.4957775375 | + |
| nspb-7      | -2.4952373759 |   |
| F33D11.1    | -2.4947076307 | + |
| ZK938.1     | -2.4936772264 |   |
| H11L12.1    | -2.4882042995 | + |
| parg-2      | -2.4864723792 |   |
| F13A2.4     | -2.4863008962 | + |
| F21F8.5     | -2.4788226334 | + |
| mei-2       | -2.4776689148 | + |
| F48C1.9     | -2.4768309299 |   |
| msp-74      | -2.4721364068 | + |
| Y51H7C.3    | -2.4687729435 | + |
| F41H10.1    | -2.4673404471 |   |
| abu-9       | -2.4629612358 |   |
| msp-56      | -2.4613310941 | + |
| nep-10      | -2.4577997431 | + |
| C53B4.3     | -2.4559741127 |   |
| msp-53      | -2.4516642724 | + |
| ssp-31      | -2.4506681536 |   |
| col-159     | -2.4465809754 |   |



|                   |               |   |
|-------------------|---------------|---|
| <i>dml-1</i>      | -2.4464321392 |   |
| <i>E02H9.7</i>    | -2.4421661881 | + |
| <i>Y57A10B.7</i>  | -2.4387488927 |   |
| <i>C05B5.12</i>   | -2.4376850622 |   |
| <i>C02F5.2</i>    | -2.4365761432 | + |
| <i>F55H12.5</i>   | -2.4355065520 | + |
| <i>Y106G6H.13</i> | -2.4346290037 |   |
| <i>F59H6.15</i>   | -2.4334187515 |   |
| <i>F54D5.5</i>    | -2.4330360940 | + |
| <i>F30A10.12</i>  | -2.4287080971 | + |
| <i>C05B5.2</i>    | -2.4275321132 | + |
| <i>C14B1.9</i>    | -2.4273430126 | + |
| <i>pqn-57</i>     | -2.4262832390 |   |
| <i>C33F10.11</i>  | -2.4231850563 | + |
| <i>fat-7</i>      | -2.4200677094 |   |
| <i>T05F1.2</i>    | -2.4195204436 | + |
| <i>nspb-3</i>     | -2.4182463128 |   |
| <i>F56D6.14</i>   | -2.4170611898 |   |
| <i>Y52D5A.2</i>   | -2.4165686844 |   |
| <i>msrp-2</i>     | -2.4150537484 |   |
| <i>ZK84.5</i>     | -2.4138454017 |   |
| <i>K07F5.17</i>   | -2.4103840813 | + |
| <i>C04F12.12</i>  | -2.4103840813 |   |
| <i>nsph-2</i>     | -2.4088070030 | + |
| <i>Y6E2A.10</i>   | -2.4074674259 |   |
| <i>M02H5.8</i>    | -2.4069538928 |   |
| <i>DY3.8</i>      | -2.4060255799 | + |
| <i>ssp-35</i>     | -2.4037082291 | + |
| <i>T23B3.5</i>    | -2.4023192537 | + |
| <i>T05G5.4</i>    | -2.3978950317 | + |
| <i>C10C5.5</i>    | -2.3928140896 |   |
| <i>nspe-8</i>     | -2.3912940447 |   |
| <i>F47D12.7</i>   | -2.3874218737 | + |
| <i>F52D2.12</i>   | -2.3862983179 | + |
| <i>T22A3.12</i>   | -2.3822663984 | + |
| <i>F47B3.2</i>    | -2.3806430231 | + |
| <i>W03B1.5</i>    | -2.3806430231 |   |
| <i>F17E9.4</i>    | -2.3757669080 | + |
| <i>msrp-1</i>     | -2.3685560750 | + |
| <i>mom-2</i>      | -2.3666369983 | + |
| <i>F52H3.6</i>    | -2.3645142493 | + |
| <i>nlp-25</i>     | -2.3640728248 |   |
| <i>C32E12.1</i>   | -2.3638994477 | + |
| <i>acp-3</i>      | -2.3632373089 | + |
| <i>K04G2.4</i>    | -2.3610327411 | + |
| <i>F35C5.1</i>    | -2.3602852144 | + |
| <i>C50E10.1</i>   | -2.3559617100 |   |
| <i>fipr-7</i>     | -2.3526263657 | + |
| <i>C47A4.5</i>    | -2.3515345322 |   |
| <i>C08A9.10</i>   | -2.3514866192 | + |
| <i>F41G3.5</i>    | -2.3480030692 | + |
| <i>C55C3.6</i>    | -2.3422511893 |   |
| <i>R105.1</i>     | -2.3405276283 | + |
| <i>nspe-3</i>     | -2.3379091317 |   |
| <i>F36A4.5</i>    | -2.3377561253 | + |
| <i>T08B6.9</i>    | -2.3368156810 |   |

|                   |               |   |
|-------------------|---------------|---|
| <i>F26F4.2</i>    | -2.3360434363 | + |
| <i>F47B8.10</i>   | -2.3339941695 | + |
| <i>T04B2.8</i>    | -2.3310081556 |   |
| <i>Y22D7AR.10</i> | -2.3283787909 | + |
| <i>lec-153</i>    | -2.3283406505 |   |
| <i>C46E10.1</i>   | -2.3255942618 |   |
| <i>Y45F10B.3</i>  | -2.3247767014 |   |
| <i>gipc-2</i>     | -2.3232046043 | + |
| <i>M162.7</i>     | -2.3191922919 | + |
| <i>T03F6.6</i>    | -2.3179940095 |   |
| <i>spe-12</i>     | -2.3178843747 |   |
| <i>misp-57</i>    | -2.3175144185 | + |
| <i>fbxa-215</i>   | -2.3137854622 | + |
| <i>K01D12.7</i>   | -2.3137391041 | + |
| <i>K07A1.5</i>    | -2.3131819207 | + |
| <i>ZK849.6</i>    | -2.3079468376 |   |
| <i>cylc-1</i>     | -2.3072763143 | + |
| <i>F36A4.4</i>    | -2.3070225434 |   |
| <i>dgtr-1</i>     | -2.3049976639 | + |
| <i>M02B1.4</i>    | -2.3049322479 | + |
| <i>K06A5.2</i>    | -2.3036140028 |   |
| <i>C09B9.4</i>    | -2.3026761563 | + |
| <i>Y53F4B.36</i>  | -2.3000979540 |   |
| <i>rmd-3</i>      | -2.2999008674 | + |
| <i>Y59H11AM.1</i> | -2.2992354842 |   |
| <i>C10G11.8</i>   | -2.2983034124 | + |
| <i>T23G11.1</i>   | -2.2978195201 |   |
| <i>T04B2.7</i>    | -2.2968442196 |   |
| <i>K08A2.2</i>    | -2.2967609812 | + |
| <i>smz-1</i>      | -2.2946548882 | + |
| <i>T12B5.15</i>   | -2.2941295316 |   |
| <i>nspa-1</i>     | -2.2928497718 |   |
| <i>ule-4</i>      | -2.2928460692 | + |
| <i>C39H7.1</i>    | -2.2926004696 | + |
| <i>nspa-5</i>     | -2.2902751724 |   |
| <i>nos-1</i>      | -2.2893733307 | + |
| <i>Y66D12A.3</i>  | -2.2872588299 |   |
| <i>27B7.6</i>     | -2.2868605900 | + |
| <i>rgs-10</i>     | -2.2856207419 | + |
| <i>nduo-3</i>     | -2.2837746640 |   |
| <i>spe-27</i>     | -2.2812393903 |   |
| <i>gpd-1</i>      | -2.2779952393 | + |
| <i>ZK858.2</i>    | -2.2689104582 |   |
| <i>ZC53.1</i>     | -2.2673148068 | + |
| <i>C50F7.3</i>    | -2.2669772999 | + |
| <i>T20B6.2</i>    | -2.2660888611 |   |
| <i>W03D8.3</i>    | -2.2659489802 | + |
| <i>F28A10.7</i>   | -2.2652724455 |   |
| <i>F36A2.10</i>   | -2.2643396864 | + |
| <i>col-141</i>    | -2.2634691824 |   |
| <i>F36H12.4</i>   | -2.2628066204 | + |
| <i>C16A11.7</i>   | -2.2619884961 |   |
| <i>nspb-1</i>     | -2.2585095385 |   |
| <i>F20D6.6</i>    | -2.2557268052 | + |
| <i>misp-40</i>    | -2.2529404085 | + |
| <i>B0261.6</i>    | -2.2517353393 | + |

|                 |               |   |
|-----------------|---------------|---|
| C47A4.3         | -2.2476093390 | + |
| <i>lido-16</i>  | -2.2470285308 |   |
| Y43F8C.9        | -2.2464062509 |   |
| F56D6.13        | -2.2436198518 |   |
| C05C12.5        | -2.2432257330 | + |
| <i>nas-20</i>   | -2.2431357046 |   |
| C46H11.6        | -2.2407953424 | + |
| C27D8.2         | -2.2397748862 | + |
| K01H12.4        | -2.2355760447 | + |
| <i>pie-1</i>    | -2.2333559870 | + |
| <i>snb-6</i>    | -2.2331681809 |   |
| C14C10.1        | -2.2321363648 | + |
| <i>dct-9</i>    | -2.2274058186 | + |
| <i>efn-3</i>    | -2.2246315532 | + |
| R102.10         | -2.2226183416 | + |
| Y59H11AM.4      | -2.2208951570 |   |
| T22D1.5         | -2.2198567990 | + |
| E03H12.5        | -2.2185956048 | + |
| Y51A2B.5        | -2.2183484683 |   |
| ZC449.8         | -2.2176535390 | + |
| <i>fipr-8</i>   | -2.2168972653 |   |
| <i>fbxa-147</i> | -2.2158089021 |   |
| <i>wdr-5.3</i>  | -2.2140239192 | + |
| Y43F8C.5        | -2.2124387920 |   |
| <i>mex-3</i>    | -2.2116045174 | + |
| C14A6.6         | -2.2109767312 | + |
| Y41E3.18        | -2.2106429051 |   |
| <i>acs-15</i>   | -2.2081312894 | + |
| C45B2.8         | -2.2030138492 |   |
| F32H2.7         | -2.2017166447 | + |
| F43E2.6         | -2.2004714355 | + |
| <i>ddo-3</i>    | -2.1981428178 | + |
| K08D12.6        | -2.1971900199 | + |
| R08A2.1         | -2.1953481006 | + |
| K04H4.5         | -2.1952890915 | + |
| F13A7.1         | -2.1936843150 | + |
| <i>inx-22</i>   | -2.1933791204 | + |
| T16G12.8        | -2.1917971138 | + |
| <i>nspb-8</i>   | -2.1914816562 |   |
| T06A10.107      | -2.1894457348 |   |
| D2062.1         | -2.1885779008 | + |
| C27D8.1         | -2.1878123714 | + |
| <i>cyb-1</i>    | -2.1872820447 | + |
| R10E9.2         | -2.1868020438 | + |
| F46F5.10        | -2.1855121272 |   |
| Y38H8A.4        | -2.1854273504 |   |
| F16C3.4         | -2.1831877821 | + |
| C04F12.7        | -2.1826803744 | + |
| <i>spch-3</i>   | -2.1824049931 | + |
| <i>cyb-3</i>    | -2.1813258571 | + |
| Y38E10A.17      | -2.1810901957 | + |
| F42A9.3         | -2.1808865691 |   |
| K07H8.7         | -2.1789277128 | + |
| <i>spch-1</i>   | -2.1781865489 | + |
| B0379.7         | -2.1780418624 | + |
| T13F3.8         | -2.1770752938 | + |

|                   |               |   |
|-------------------|---------------|---|
| <i>B0379.2</i>    | -2.1764480937 | + |
| <i>snf-2</i>      | -2.1753427168 | + |
| <i>spch-2</i>     | -2.1713609007 | + |
| <i>F36H1.3</i>    | -2.1707634130 | + |
| <i>aptf-2</i>     | -2.1701131925 | + |
| <i>clp-8</i>      | -2.1696981396 | + |
| <i>Y71G12B.22</i> | -2.1686691686 |   |
| <i>gsp-4</i>      | -2.1686296497 | + |
| <i>F54F7.3</i>    | -2.1664267973 |   |
| <i>K02F6.7</i>    | -2.1658048072 | + |
| <i>Y57G11A.2</i>  | -2.1645108429 |   |
| <i>Y51H7C.9</i>   | -2.1642963976 |   |
| <i>R10E4.6</i>    | -2.1642897000 | + |
| <i>W03B1.9</i>    | -2.1628427935 |   |
| <i>phy-3</i>      | -2.1620474721 | + |
| <i>C45G9.9</i>    | -2.1619033913 | + |
| <i>T23F11.2</i>   | -2.1618877751 | + |
| <i>T28B8.6</i>    | -2.1607116624 |   |
| <i>C01G12.9</i>   | -2.1600530992 | + |
| <i>Y57G11C.23</i> | -2.1594072162 |   |
| <i>F58E6.5</i>    | -2.1575299528 | + |
| <i>W04A4.2</i>    | -2.1542001051 | + |
| <i>Y43C5B.3</i>   | -2.1538011039 |   |
| <i>W04E12.4</i>   | -2.1518734123 | + |
| <i>K12B6.11</i>   | -2.1502826403 |   |
| <i>irld-8</i>     | -2.1501747290 | + |
| <i>nspb-10</i>    | -2.1500406686 |   |
| <i>C35B1.4</i>    | -2.1497977466 | + |
| <i>F21D9.2</i>    | -2.1491867144 |   |
| <i>smz-2</i>      | -2.1474920267 | + |
| <i>K10D6.3</i>    | -2.1438822185 | + |
| <i>ZC250.5</i>    | -2.1423167132 |   |
| <i>cyp-31A5</i>   | -2.1418780203 | + |
| <i>pph-4.2</i>    | -2.1408562036 | + |
| <i>C43G2.3</i>    | -2.1407263633 | + |
| <i>ZK353.3</i>    | -2.1404219087 |   |
| <i>clcc-209</i>   | -2.1379370605 |   |
| <i>C02F5.5</i>    | -2.1378350827 | + |
| <i>ZK354.6</i>    | -2.1363458799 |   |
| <i>nep-19</i>     | -2.1350785416 |   |
| <i>F25H5.8</i>    | -2.1343617390 | + |
| <i>R02F2.4</i>    | -2.1341662963 | + |
| <i>W09D6.4</i>    | -2.1337294810 | + |
| <i>F56A4.2</i>    | -2.1320600165 |   |
| <i>Y57G11C.52</i> | -2.1319759800 |   |
| <i>C27D6.11</i>   | -2.1316703320 | + |
| <i>Y53F4B.19</i>  | -2.1293269464 |   |
| <i>C55C3.4</i>    | -2.1283252652 | + |
| <i>F26E4.5</i>    | -2.1282380444 | + |
| <i>T16A9.5</i>    | -2.1246086250 |   |
| <i>snf-5</i>      | -2.1243847288 |   |
| <i>F54H12.5</i>   | -2.1232509843 | + |
| <i>kfp-15</i>     | -2.1218864631 | + |
| <i>Y53C10A.10</i> | -2.1216665812 | + |
| <i>Y23H5B.12</i>  | -2.1213510305 |   |
| <i>K01D12.15</i>  | -2.1210721409 | + |

|            |               |   |
|------------|---------------|---|
| F30A10.13  | -2.1200024324 | + |
| Y71G12B.3  | -2.1189060923 |   |
| F21F3.2    | -2.1170722044 | + |
| col-126    | -2.1162441444 |   |
| clp-6      | -2.1161863856 |   |
| acdh-5     | -2.1154531039 | + |
| K09E4.1    | -2.1139269210 | + |
| C17C3.11   | -2.1133312502 | + |
| C06A1.3    | -2.1132031401 | + |
| R13H9.5    | -2.1125997105 | + |
| F40H6.1    | -2.1070142142 | + |
| neg-1      | -2.1058899408 | + |
| C17H12.12  | -2.1030885285 | + |
| F30A10.14  | -2.1011576536 | + |
| C27D6.3    | -2.0991468303 | + |
| Y116A8C.23 | -2.0987865909 |   |
| decr-1.1   | -2.0971636653 | + |
| T28B8.4    | -2.0964891767 |   |
| C33C12.4   | -2.0932286318 | + |
| K07A3.3    | -2.0929401485 | + |
| Y73F8A.20  | -2.0923737912 |   |
| col-127    | -2.0913035623 |   |
| C02E7.7    | -2.0908239131 | + |
| M28.9      | -2.0907950521 | + |
| W03D8.5    | -2.0890909060 |   |
| Y39E4A.1   | -2.0886997040 |   |
| C32E8.4    | -2.0883279537 | + |
| nep-8      | -2.0877752251 | + |
| F55D12.6   | -2.0856613981 |   |
| cyp-31A2   | -2.0847214256 | + |
| htas-1     | -2.0829923796 | + |
| K08F4.5    | -2.0816084098 | + |
| T05D4.5    | -2.0793329199 |   |
| F13H8.12   | -2.0787168071 | + |
| cav-1      | -2.0740851776 | + |
| Y57G11C.14 | -2.0736904926 | + |
| K04C2.8    | -2.0733132536 |   |
| W09C3.8    | -2.0726805293 |   |
| K06A4.6    | -2.0715931517 |   |
| K06A4.6    | -2.0713135551 |   |
| ZK945.7    | -2.0711694191 |   |
| C31H1.5    | -2.0706142655 | + |
| D1086.17   | -2.0702020968 | + |
| Y59A8B.12  | -2.0694856509 | + |
| C04F12.16  | -2.0692720136 |   |
| ZK596.2    | -2.0685634751 |   |
| F11E6.3    | -2.0685058842 | + |
| basl-1     | -2.0682146768 | + |
| D1022.3    | -2.0671858922 | + |
| lab-1      | -2.0650412836 | + |
| R07C3.13   | -2.0636468535 | + |
| C49F5.6    | -2.0620472682 | + |
| H04D03.6   | -2.0620286340 | + |
| Y39B6A.30  | -2.0586714182 |   |
| T04F3.3    | -2.0584616987 |   |
| sfxn-1.2   | -2.0584213207 | + |

|                 |               |   |
|-----------------|---------------|---|
| C39B5.5         | -2.0576935906 |   |
| <i>daf-18</i>   | -2.0567207100 | + |
| <i>nspd-9</i>   | -2.0564346709 | + |
| Y57G7A.5        | -2.0559947502 | + |
| F13E9.5         | -2.0536229444 | + |
| <i>col-135</i>  | -2.0524306545 | + |
| R10E4.7         | -2.0507837628 |   |
| W03D8.9         | -2.0494727491 |   |
| C17G1.2         | -2.0477137884 | + |
| Y57G11C.5       | -2.0469791160 |   |
| Y41C4A.18       | -2.0442410574 |   |
| F36H12.17       | -2.0415305648 | + |
| C36F7.5         | -2.0409207392 | + |
| ZK688.10        | -2.0388266495 |   |
| <i>fis-1</i>    | -2.0383320599 |   |
| T22B3.3         | -2.0372473449 | + |
| W03D8.1         | -2.0370138540 |   |
| F02E9.3         | -2.0368148082 | + |
| Y54E2A.5        | -2.0338644934 |   |
| C18H7.4         | -2.0337966717 | + |
| H12D21.5        | -2.0328502185 | + |
| <i>cyp-13A4</i> | -2.0324789308 |   |
| F07A5.2         | -2.0322486199 | + |
| Y69A2AR.19      | -2.0319209469 |   |
| <i>gsp-3</i>    | -2.0300971992 | + |
| F07G6.10        | -2.0296437944 |   |
| <i>col-160</i>  | -2.0241577573 |   |
| <i>pal-1</i>    | -2.0238510082 | + |
| <i>nep-24</i>   | -2.0236799007 |   |
| W06F12.3        | -2.0208570122 |   |
| B0524.5         | -2.0205223272 | + |
| F40F9.3         | -2.0200320296 | + |
| Y65B4A.9        | -2.0195039170 |   |
| <i>ugt-41</i>   | -2.0185651992 |   |
| M88.3           | -2.0176857011 | + |
| F53G12.8        | -2.0168293385 | + |
| C16C8.12        | -2.0158826922 | + |
| R08C7.8         | -2.0150821015 | + |
| F54C1.8         | -2.0147030599 |   |
| F58F12.2        | -2.0142139218 | + |
| <i>ssq-3</i>    | -2.0134423367 |   |
| ZK945.8         | -2.0121562066 |   |
| <i>clcc-147</i> | -2.0112189437 | + |
| <i>col-162</i>  | -2.0109644991 |   |
| C30F12.4        | -2.0103191220 | + |
| B0207.11        | -2.0091346469 |   |
| C06E2.5         | -2.0069301109 | + |
| R193.2          | -2.0066657974 |   |
| <i>nspc-7</i>   | -2.0059376094 |   |
| <i>ify-1</i>    | -2.0058745528 | + |
| M110.7          | -2.0039262723 | + |
| <i>ssp-36</i>   | -2.0016856901 |   |
| Y40H4A.2        | -2.0014039592 |   |
| T28H11.7        | -2.0004023834 |   |
| F32B6.4         | -2.0000783752 | + |

Note:.-Expression information of candidate genes is from <https://wormbase.org>.-Statistical significance:  $P < 0.01$ .
